# Simple spike dynamics of Purkinje cells in the macaque vestibulo-cerebellum reflect sensory prediction error

JEAN LAURENS<sup>1</sup> AND DORA E. ANGELAKI<sup>1,2</sup>

<sup>1</sup> Department of Neuroscience, Baylor College of Medicine, Houston TX

<sup>2</sup> Center for Neural Science and Tandon School of Engineering, New York University, NY, USA

**Acknowledgements:** The work was supported by NIH grant DC004260. The authors would like to acknowledge Hui Meng's contributions to the recordings.

Contact information:

Dr. Dora E. Angelaki

Email: da93@nyu.edu

Center for Neural Science, Meyer 901

New York University, NY 1003

## Abstract

Theories of cerebellar functions posit that the cerebellum implements forward models for online correction of motor actions and sensory estimation. As an example of such computations, a forward model compensates for a sensory ambiguity where the peripheral otolith organs in the inner ear sense both head tilts and translations. Here we exploit the response dynamics of two functionally-coupled Purkinje cell types in the caudal vermis to understand their role in this computation. We find that one population encodes tilt velocity, whereas the other, translation-selective, population encodes linear acceleration. Using a dynamical model, we further show that these signals likely represent sensory prediction error for the on-line updating of tilt and translation estimates. These properties also reveal the need for temporal integration between the tilt-selective velocity and translation-selective acceleration population signals. We show that a simple model incorporating a biologically plausible short time constant can mediate the required temporal integration.

28

## Introduction

29

30 More than a century since the pioneering work of Ramon y Cajal (Cajal 1911), the cerebellum continues  
31 to represent a powerful model for understanding neural circuits. Its stereotyped anatomy (Palay & Chan-Palay  
32 1976), its remarkably organized connectivity (Ruigrok 2011; Voogd 2011), and its profoundly tractable cellular  
33 identities (Eccles 1965; 1973) have motivated numerous recent advances in dissecting how cerebellar circuits  
34 are wired using modern molecular and optogenetic manipulations (Ankri et al 2015; Gao et al 2016; Guo et al  
35 2014; 2016; Nguyen-Vu et al 2013; Witter et al 2016). In parallel to superb cellular and circuit organization  
36 discoveries, theory-driven studies have defined algorithmic computations likely performed by the cerebellar  
37 circuit. These computations extend beyond motor learning, into a modular organization for sensorimotor  
38 prediction and internal models (Wolpert et al 1998; Green & Angelaki 2010; Shadmehr et al 2010; Popa et al.  
39 2012; 2013; 2016; 2017; Streng et al. 2018). However, little is currently known about how these computations  
40 map into the circuit. Thus, a major conceptual gap exists of how computational algorithms are mapped onto the  
41 canonical cerebellar circuit (Ito 2005).

42 One such internal model implemented by brainstem-cerebellar circuits merges signals from both  
43 vestibular end organs, the otoliths and semicircular canals, to resolve a sensory ambiguity (**Fig. 1A**) (Einstein,  
44 1907): otolith afferents cannot distinguish linear acceleration ( $A$ ) experienced during translations from  
45 gravitational acceleration ( $G$ ) experienced during head tilt. Instead, otolith afferents encode the total gravito-  
46 inertial acceleration,  $GIA = G+A$  (**Fig. 1B**), thus responding identically to translational acceleration and tilt  
47 position (units:  $m/s^2$ , or equivalently,  $^\circ$  of tilt). Theoretical (Mayne, 1974; Oman, 1982; Borah et al., 1988;  
48 Merfeld, 1995; Glasauer and Merfeld, 1997; Bos and Bles, 2002; Zupan and Merfeld, 2002; Laurens and Droulez,  
49 2007; Laurens and Angelaki, 2011, 2017; Karmali and Merfeld, 2012; Lim et al., 2017) and experimental  
50 (Angelaki et al. 2004; Shaikh et al. 2005; Yakusheva et al. 2007; 2008; 2010; Laurens et al. 2013a,b; Dugué et al.  
51 2017; Stay et al. 2019) studies have demonstrated that the brain resolves this ambiguity by using head rotation  
52 signals, originating from the vestibular semicircular canals, to track head movements relative to vertical, from  
53 which the gravitational component ( $G$ ) can be estimated.

54 Although mathematical models of tilt-translation discrimination somewhat differ in their formulation  
55 (Mayne, 1974; Borah et al., 1988; Merfeld, 1995; Glasauer and Merfeld, 1997; Bos and Bles, 2002; Zupan and  
56 Merfeld, 2002; Laurens and Angelaki, 2011, 2017; Karmali and Merfeld, 2012), they all incorporate two salient  
57 computations (**Fig. 1C**): (1) the activity of semicircular canals, which encodes rotation velocity in an egocentric  
58 (head) reference frame (units:  $^\circ/s$ ) is spatially transformed (**Fig. 1C, eq. 1**: the vectorial cross-product converts  
59 head-referenced rotation velocity signal ( $\Omega$ ) into a gravity-referenced tilt velocity signal,  $dG/dt$ ); and (2) this

60 canal-driven tilt signal must ‘combine’ with otolith afferent information, but the latter signals linear acceleration  
61 or tilt position relative to gravity. Often it has been assumed that the canal-driven, spatially-transformed signal  
62 must be temporally integrated (**eq. 2**: integration of tilt velocity signals into position) in order to estimate  $G$ ,  
63 which is then subtracted from the otolith signal to compute linear acceleration (**eq. 3**). Note, however, that the  
64 brain might implement alternative but functionally equivalent computational schemes. In particular, **eq. 3** could  
65 be implemented in the velocity domain (**Fig. 1D, eq. 3'**), implying a differentiation of the otolith-driven signal  
66 rather than an integration of the canal-driven signal.

67 Laurens et al (2013b) have indeed identified translation-selective and tilt-selective Purkinje cells as the  
68 neuronal correlates of the hypothesized tilt and translation signals. They have demonstrated that tilt-selective  
69 Purkinje cells encode spatially transformed signals (i.e. **eq. 1** or downstream) and that tilt- and translation-  
70 selective cells are functionally coupled (by **eq. 3** or **eq. 3'**). However, the sinusoidal stimuli used in past  
71 experiments can't resolve neuronal response dynamics. Therefore, whether tilt-selective neurons encode tilt ( $G$ )  
72 or tilt velocity (abbreviated here as ‘ $dG$ ’), and whether translation-selective Purkinje cells encode linear  
73 acceleration (‘ $A$ ’) or its derivative (abbreviated here as ‘ $dA$ ’) is unknown. Distinguishing between these  
74 possibilities is a crucial step for understanding the computational algorithms implemented by central vestibular  
75 regions, and for identifying other components of the tilt/translation discrimination circuits.

76 In this study, we consider three alternative hypotheses, all of which would be consistent with the  
77 hypothesized computations: Tilt-selective cells may encode  $dG$  and translation-selective cells  $A$  (hypothesis  $H_1$ ,  
78 **Fig. 1E**). If this holds, then there is a functional need for temporal integration of the simple-spike signal of tilt-  
79 selective cells to implement **eq. 2**, before it reaches translation-selective cells (**eq. 3**). This would suggest that  
80 another, yet unidentified, cell type, may encode a tilt signal ( $G$ ). Alternatively, tilt-selective cells may encode  $G$   
81 and translation-selective cells  $A$  (hypothesis  $H_2$ , **Fig. 1F**). In this case, the integration (**eq. 2**) would occur  
82 upstream of tilt-selective Purkinje cells, or possibly in their dendritic tree. Finally, tilt-selective cells may encode  
83  $dG$  and translation-selective cells  $dA$  (hypothesis  $H_3$ , **Fig. 1G**), in which case the need for (**eq. 2**) would be  
84 eliminated.

85 Beyond understanding the tilt/translation disambiguation circuitry, discriminating between these  
86 hypotheses is also relevant for understanding how cerebellar networks implement sensorimotor internal  
87 models. There is growing evidence that not all types of error signals are carried by complex spikes (that lead to  
88 LTD of parallel fiber to Purkinje cell synapses; Marr, 1969; Albus, 1971; Ito and Kano, 1982; Ito, 2000). Additional  
89 error signals, which can cause plasticity in cerebellar and vestibular nuclei (Boyden et al. 2004; Ke et al. 2009),  
90 might be carried by the simple spike (SS) activity itself and encode feedback signals to optimize sensorimotor  
91 performance (Shadmehr et al. 2010; Popa et al. 2012; 2013; 2016; 2017; Streng et al. 2018). We recently

92 implemented a Kalman filter model of self-motion sensation, where an internal model of head motion is  
93 continuously updated by feedback signals driven by sensory prediction errors (Laurens and Angelaki, 2017). This  
94 model, detailed further in Methods, predicts that feedback signals that update the internal estimates of tilt and  
95 translation should be proportional to tilt velocity and linear acceleration, respectively. Therefore, if Purkinje cells  
96 in the caudal vermis encode sensory prediction feedback signals, then the responses of tilt-selective Purkinje  
97 cells should correspond to *eq. 1*, whereas the responses of translation-selective cells should correspond to *eq. 3*.  
98 These Kalman filter model predictions favor hypotheses  $H_1$ .

99 To distinguish among these three hypotheses ( $H_1$ ,  $H_2$ ,  $H_3$ ; **Fig. 1E-G**), we have recorded Purkinje cell  
100 simple spike (SS) activity using transient tilt, translation and tilt-translation stimuli that allow quantitative  
101 assessment of the response dynamics of tilt- and translation-selective Purkinje cells. A transient stimulus  
102 approach is necessary, as sinusoidal stimuli can't resolve complex dynamic responses that do not follow linear  
103 systems properties (Angelaki and Dickman 2000; Dickman and Angelaki 2002; Laurens et al. 2017). The present  
104 results strongly support hypothesis  $H_1$ , suggesting that Purkinje cell SS activity reflects sensory prediction errors.  
105 In particular, tilt-selective Purkinje cells may provide an on-line error signal for a forward model of how  
106 semicircular canal rotation signals can be mapped into an allocentric reference frame that governs spatial  
107 orientation and navigation in the terrestrial world (Laurens and Angelaki 2017).

108

109

## Results

110

### **Experimental Findings**

112 We recorded from NU Purkinje cells during transient tilt and translation stimuli with biphasic linear  
113 acceleration and Gaussian linear velocity profiles ( $\sigma = 250$  ms), as illustrated in **Fig. 2A-E**. The tilt and translation  
114 stimuli were matched such that they activated the otoliths identically (**Fig. 2E**, first/second column; Angelaki et  
115 al. 2004; Shaikh et al. 2005; Yakusheva et al. 2007; 2008; 2010; Laurens et al. 2013a,b). During tilt-translation  
116 motion, tilt-driven and translation-driven otolith activation cancel each other (**Fig. 2E**, third column). Because  
117 the derivative of the biphasic tilt position (**Fig. 2B**, green) and linear acceleration (**Fig. 2C**, red) profiles follow a  
118 triphasic curve (e.g. tilt velocity in **Fig. 2D**, cyan), and because these signals ride on-top of a large spontaneous  
119 activity, the multiple temporal components of the models in **Fig. 1C** (i.e.  $G$ ,  $A$ ,  $GIA$ ,  $dG/dt$ ) as well as additional  
120 dynamic components (i.e. the integral of  $G$  and  $A$ , or the second derivative of  $G$  and  $A$ ; **Fig. 1 Suppl. 1A**) can be  
121 distinguished.

122 Typical responses of tilt-selective and translation-selective Purkinje cells during the transient stimuli  
123 (with  $\sigma = 250$  ms) are illustrated in **Fig. 2F,G**. During tilt, the example tilt cell exhibited a triphasic response

124 modulation that was either proportional (preferred direction, PD; **Fig. 2F**, top) or inversely proportional (anti-PD;  
125 **Fig. 2F**, bottom) to tilt velocity (**Fig. 2D**, cyan). Here PD is defined as the direction along which firing rate is  
126 positively correlated with the stimulus; therefore the cell is inhibited during motion in its PD because tilt velocity  
127 is negative (**Fig. 2D**). The example tilt cell's response resembles tilt velocity (the large peak/trough responses to  
128 tilt are flanked by smaller troughs/peaks) not only during tilt, but also during tilt-translation (**Fig. 2F**, left and  
129 right columns, respectively), but is negligible during translation (**Fig. 2F**, middle column). By contrast, the  
130 example translation cell modulates little during tilt (**Fig. 2G**, left), but responds vigorously to translation (**Fig. 2G**,  
131 middle) and tilt-translation (**Fig. 2G**, right). During translation along the cell's PD (**Fig. 2G**, top), the cell exhibits a  
132 biphasic response whose dynamics follows the acceleration stimulus (**Fig. 2C**, red). The response reverses during  
133 motion along the anti-PD (**Fig. 2G**, bottom). Note that both tilt and translation Purkinje cells modulate during  
134 tilt-translation, when only the canals are dynamically modulated. This illustrates the fact that NU Purkinje cells  
135 receive convergent inputs from both sensors (Yakusheva et al. 2007; Laurens et al. 2013b).

136 These two example cells suggest that tilt Purkinje cells may follow tilt velocity ( $dG/dt$ ), whereas  
137 translation Purkinje cells may follow linear acceleration ( $A$ ), in support of hypothesis  $H_1$ . We analyzed the  
138 transient responses of 30 NU Purkinje cells (3 macaques) which were specifically selected to be either tilt-  
139 selective ( $n=14$ ) or translation-selective ( $n=16$ ) following the criteria of Laurens and Angelaki (2013a,b). Note  
140 that cell classification was similar using transient and sinusoidal stimuli (**Table S1**).

141 We evaluated neuronal modulation by computing the difference in firing rate between motion in the PD  
142 and anti PD (**Fig. 3**). Note that this process cancels a quantitatively smaller omnidirectional component (**Fig. 3**  
143 **Suppl. 1**) and only focuses on the direction-dependent responses. We measured each neuron's peak-to-trough  
144 direction-dependent response during tilt and translation, as illustrated in the scatter plot of **Fig. 3A**). During  
145 translation, the responses of translation-selective cells were one order of magnitude larger than those of tilt-  
146 selective cells (389 spk/s/G, CI = [265-572] versus 39 spk/s/G, CI = [28-54];  $p = 4.10^{-6}$ , geometric mean and  
147 Wilcoxon sign rank test). In contrast, tilt- and translation-selective cells had comparable peak-to-trough  
148 modulation during tilt (tilt-selective cells: 151 spk/s/G, CI=[122-187]; translation-selective cells: 132 spk/s/G,  
149 CI=[94-184],  $p = 0.55$ ). Thus, the range of response modulation amplitude during transient tilt and translation  
150 was remarkably similar to previous findings using sinusoidal stimuli (Laurens and Angelaki 2013b).

151 Next we assessed which dynamic components are represented in neural responses. Our working  
152 hypotheses ( $H_1$ ,  $H_2$ ,  $H_3$ ) consider only two temporal components: (i)  $G$  (tilt position) and  $A$  (linear acceleration) –  
153 both of which have identical waveforms (**Fig. 1**; see also **Fig. 1 Suppl. 1**), and (ii)  $dG$  (abbreviation for  $dG/dt$ , tilt  
154 velocity) and  $dA$  (abbreviation for  $dA/dt$ , derivative of linear acceleration; i.e. jerk) signals – both of which also  
155 have identical waveforms (**Fig. 1**; see also **Fig. 1 Suppl. 1**). To characterize the cells' response dynamics

156 independently of their selectivity for tilt, translation or mixture thereof, we grouped motion variables with  
157 similar dynamics (i.e. G with A and dG with dA) and computed the partial coefficient of correlation of each pair  
158 (G/A and dG/dA) for each individual cell's response. For generality, we included two additional dynamic  
159 components ( $\int G/\int A$  and  $d^2G/d^2A$ ; **Fig. 1 Suppl. 1**) in the analysis. We found that the dG/dA component had the  
160 highest contribution to the responses of tilt cells (**Fig. 3B**,  $p < 0.01$ , multiple paired Wilcoxon tests, Bonferroni  
161 correction), whereas the G/A component had the highest contribution in translation cells (**Fig. 3B**,  $p < 0.01$ ,  
162 multiple paired Wilcoxon tests, Bonferroni correction). In contrast, the partial correlation coefficients of the  
163  $\int G/\int A$  and  $d^2G/d^2A$  components were minimal. Thus, only the dG, dA, G and A components are considered in  
164 further analysis.

165 When plotted on a cell-by-cell basis, we found that the two cell types showed distinctly different  
166 response dynamics (**Fig. 3C**, green vs. red). Many tilt-selective cells clustered along the ordinate, and most  
167 (12/14,  $p = 0.002$ , paired Wilcoxon test) appear above the diagonal, indicating that the dG/dA profile dominates  
168 the responses of tilt-selective Purkinje cells. Considering that, by definition, tilt cells encode tilt, we conclude  
169 that tilt-selective cells carry predominantly a tilt velocity (dG) signal. Translation-selective cells clustered close to  
170 the abscissa and only one cell appeared above the diagonal ( $p = 0.0016$ ), indicating that translation-selective  
171 cells carry acceleration (A) signals.

172 These conclusions are further illustrated in the average response profiles (**Fig. 4**; see also individual cell  
173 responses in **Fig. 4 Suppl. 1**). In line with the example cells in **Fig. 2F**, the average translation-selective cell  
174 exhibited a biphasic response profile that followed linear acceleration (**Fig. 4C**, red). The average tilt-selective  
175 cell exhibited a triphasic response profile that followed tilt velocity (**Fig. 4C**, green); although it displayed a slight  
176 asymmetry, where the second excitatory peak was attenuated compared to the first. This can be attributed to a  
177 small, but non-zero, G response, as shown in **Fig. 4D-F**. We plotted the G response component of tilt cells (**Fig.**  
178 **4D**) as a function of their dG component. We found that both were correlated ( $p < 10^{-3}$ , bootstrap test), indicating  
179 that tilt-selective cells carry a G response component that is proportional to the dG component with about half  
180 the amplitude (slope = 0.47, CI = [0.27-0.79]). Plotting the average dG and G response components together (**Fig.**  
181 **4E**) illustrates that the first peak of the G component (grey) tends to increase the first peak of the dG component  
182 (black), whereas the second peak of the G component reduces the last peak of the dG component. When these  
183 components are added (**Fig. 4F**, broken black line), this results in an asymmetrical profile that matches the  
184 average response profile of tilt cells (**Fig. 4F**, green, same as in **Fig. 4C**). This analysis, which reveals that tilt-  
185 selective cells encode primarily dG but also carry a weaker G component, is compatible with previous  
186 observations during sinusoidal motion at 0.5 Hz (Laurens et al. 2013b) where the response lagged tilt velocity by  
187  $36^\circ$  (i.e. shifted towards tilt position). We repeated the same analysis for translation-selective cells (**Fig. 4G-I**).

188 We found that these cells carry a small dA response (slope = -0.16, CI = [-0.24 to -0.06],  $p = 10^{-3}$ ), although this  
189 component was too small to alter the cell's biphasic response profile markedly (**Fig. 4H**). In agreement, we  
190 observed (Laurens et al. 2013b) that the response phase of translation-selective cells was closely aligned with  
191 linear acceleration during sinusoidal motion.

192 Analyses of responses to a longer transient stimulus ( $\sigma = 500$  ms) gave identical results (**Fig. 4 Suppl. 2**).  
193 In fact, other than a small but systematic increase in the gain of tilt cells (**Fig. 4 Suppl. 2E-F**), both sets of  
194 transient stimuli yield identical results.

195

### 196 ***The dynamics of tilt- and translation-selective cells is consistent with feedback signals in an optimal model of*** 197 ***head motion***

198 There is now ample evidence that the brain separates gravity from linear acceleration (and processes  
199 self-motion information in general) by implementing a forward internal model of the vestibular organs (Borah et  
200 al. 1988; Merfeld 1995; Glasauer and Merfeld 1997; Merfeld et al. 1999; Angelaki et al. 1999, 2004; Laurens and  
201 Droulez 2007; Laurens and Angelaki 2011, 2017; Karmali and Merfeld 2012). This mechanism was recently  
202 formalized into a Kalman filter model (Laurens and Angelaki, 2017), where internal estimates of head motion ( $\Omega$ ,  
203  $G$  and  $A$ ) are used to predict vestibular afferent signals based on internal models of the semicircular canals and  
204 otolith organs. Differences between the predicted and actual afferent signals drive feedback loops that update  
205 the internal motion estimates.

206 In this schema, the internal model of the otoliths plays a central role in solving the gravito-inertial  
207 ambiguity, as outlined in **Fig. 5**. Rotation signals (derived from the internal model of the semicircular canals; see  
208 Laurens and Angelaki 2017 for details) are spatially transformed (**eq. 1**) and temporally integrated (**eq. 2**) to  
209 estimate  $G$ , as in **Fig. 1C**. The internal estimates of  $G$  and of linear acceleration ( $A$ ) are fed into a forward internal  
210 model of the otoliths that predicts their activity (**Fig. 5**, 'Otolith model'). Differences between the predicted and  
211 actual sensory inflow from the otoliths ( $GIA$ ) results in feedback (**Fig. 5**, 'Otolith feedback signals') that corrects  
212 the internal estimates of acceleration (**Fig. 5**, 'Acceleration', red), tilt (**Fig. 5**, 'Somatogravic tilt', green,  
213 quantitatively minor here, see Methods) and rotation ('Velocity', cyan, see Laurens and Angelaki 2011, 2017 for  
214 details). During passive translations, the translation feedback closes a loop that implements **eq. 3** (see Laurens  
215 and Angelaki, 2017).

216 In this study, we found that tilt-selective cells encode primarily tilt velocity. Furthermore, we found  
217 previously that they carry signals that correspond to the somatogravic feedback (Laurens and Angelaki, 2013b;  
218 see next section). We also found here that translation-selective cells encode linear acceleration. Thus, the



219 responses of tilt- and translation-selective cells correspond to the properties of feedback pathways in an optimal  
220 model of vestibular information processing.

221

### 222 ***A biologically plausible model of temporal integration***

223 These experimental findings support hypothesis  $H_1$ , where the output of tilt-selective Purkinje cells,  
224 which encode  $dG/dt$ , must get temporally integrated into a G signal (**Fig. 1C**, *eq. 2*) before interacting with  
225 translation-selective Purkinje cells. This integration may be performed by a population of neurons (**Fig. 6A**, ‘Tilt  
226 Position’ neurons), functionally located between these Purkinje cell types. Yet, although (*eq. 2*) implies that this  
227 neuronal population should perform a perfect integration, this operation may not be biologically plausible.  
228 Instead, the hypothesized neuronal population may perform a leaky integration, with a time constant of  $\sim 1s$ ,  
229 and therefore integrate canal-driven rotation signal accurately at high frequencies only. At low frequencies, this  
230 population’s activity may be sustained by otolith-driven somatogravic feedback signals conveyed by tilt-selective  
231 cells. To test this scheme quantitatively, we simulated a network model (see Methods) during transient tilt and  
232 translation as well as static tilt (**Fig. 6B,C**). As shown in **Fig. 6D-F**, simulations agree with experimental data.  
233 First, tilt-selective Purkinje cells (**Fig. 6D**, green) follow tilt velocity (**Fig. 6C**, cyan) during tilt, and their simulated  
234 response is reduced during static tilt (since tilt velocity is null) and translation (where only a faint response,  
235 driven by the somatogravic feedback, is observed). In contrast, the intermediate neuronal population (**Fig. 6E**,  
236 green) responds in phase with tilt position (**Fig. 6B**, green), including static tilt (although with a smaller gain; 0.72  
237 compared to dynamic tilt), and have reduced responses during translation. Finally, translation-selective Purkinje  
238 cells (**Fig. 6F**, red) follow linear acceleration (**Fig. 6B**, red) and have reduced responses during all tilt protocols.  
239 Thus, our simulations confirm that G signals may be computed by a leaky integration with a time constant of 1s,  
240 in conjunction with the somatogravic effect, which provides a steady-state tilt signal.

241

242

## 242 **Discussion**

243

244 We have shown that tilt- and translation-selective Purkinje cells differ in response dynamics: tilt-  
245 selective cells encode primarily tilt velocity, whereas translation-selective cells encode linear acceleration. These  
246 dynamics are consistent with the notion that the simple spike response of Purkinje cells encode feedback signals  
247 that derive from sensory predictions errors and are computed by a forward internal model of the vestibular  
248 organs (**Fig. 5**; Laurens and Angelaki 2017).

249 Laurens et al. (2013b) has shown that the sum of the population responses of tilt and translation-  
250 selective Purkinje cells sum to the GIA. Furthermore, local gabazine injection into the cortex converts



251 translation-selective Purkinje cells into GIA-coding cells (Yakusheva et al., 2013). Thus, it has been proposed that  
252 translation-selective Purkinje cells generate their responses through convergence of otolith (GIA) and the tilt-  
253 selective Purkinje cell population signals (Laurens et al. 2013b). Combined with the present findings, we  
254 conclude that the output of tilt Purkinje cells should be temporally integrated before relayed to translation-  
255 selective Purkinje cells. Simulations (**Fig. 6**) suggest that this may be accomplished by a simple neuronal circuit  
256 performing a leaky integration with a biologically plausible time constant.

257 The framework of internal models has been the dominant theory of vestibular processing in the past  
258 decades (Mayne, 1974; Oman, 1982; Borah et al., 1988; Merfeld, 1995; Glasauer and Merfeld, 1997; Bos and  
259 Bles, 2002; Zupan and Merfeld, 2002; Laurens, 2006; Laurens and Droulez, 2007, 2008; Laurens and Angelaki,  
260 2011, 2017; Karmali and Merfeld, 2012; Lim et al., 2017) and is closely related to the framework used to model  
261 motor control and adaptation (Wolpert et al., 1995; Körding and Wolpert, 2004; Todorov, 2004; Chen-Harris et  
262 al., 2008; Berniker et al., 2010; Berniker and Körding, 2011; Franklin and Wolpert, 2011; Sağlam et al., 2011,  
263 2014). Initially supported by behavioral studies using passive motion stimuli (e.g. Merfeld et al. 1993, 1999;  
264 Laurens et al. 2010, 2011), the implementation of internal models has been confirmed by neurophysiological  
265 experiments of tilt/translation discrimination (Angelaki et al. 2004; Shaikh et al. 2005; Yakusheva et al. 2007;  
266 2008; 2010; Laurens et al. 2013a,b; Dugué et al. 2017; Stay et al. 2019) and active head movements (Roy and  
267 Cullen, 2004; Cullen et al., 2011; Cullen, 2012; Carriot et al., 2013; Brooks and Cullen, 2013,2014; Brooks et al.,  
268 2015). Laurens and Angelaki (2017) have formulated a Kalman filter to model neuronal responses in the  
269 vestibular nuclei, cerebellar cortex and deep cerebellar nuclei during both active and passive motion (shown in  
270 simplified form in **Fig. 5A**). The present study demonstrates that the SS response dynamics of tilt- and  
271 translation-selective Purkinje cells reflects tilt velocity and translation feedback signals predicted by the Kalman  
272 filter. This finding supports the hypothesis that the SS activity of Purkinje cells carry sensory prediction error  
273 signals, a critical component of a dynamical control framework supporting optimal sensorimotor functions  
274 (Shadmehr et al. 2010; Popa et al. 2012; 2013; 2016; 2017; Streng et al. 2018).

275 The Kalman filter also predicts that feedback signals, and consequently the activity of tilt- and  
276 translation-selective cells, should be profoundly attenuated during active tilt and translation, similar to neuronal  
277 responses measured in the vestibular nuclei, fastigial nuclei and cerebellar cortex (Roy and Cullen, 2004; Cullen  
278 et al., 2011; Cullen, 2012; Carriot et al., 2013; Brooks and Cullen, 2013,2014; Brooks et al., 2011; Lee et al. 2015;  
279 Dugué et al., 2017). In agreement with this prediction, one study (Lee et al. 2015) conducted when rats learn to  
280 balance on a swing indicates that Purkinje cells in various lobules (V to X) of the cerebellar vermis encode tilt  
281 velocity during external perturbations, but not learned active movement. Interestingly, the Kalman filter  
282 predicts that the central estimate of tilt, which may be carried by cortical interneurons (see next paragraph),

283 should not be attenuated during active tilt. Future recording studies of cerebellar interneurons should  
284 investigate these predictions further.

285 Although tilt-selective Purkinje cells encode predominantly tilt velocity, we found that they carry a  
286 smaller but consistent tilt position component (**Fig. 4D-F**). This finding is consistent with Laurens et al. (2013b),  
287 which reported response phase shifted by 36° towards tilt position during sinusoidal tilt at 0.5Hz. Thus, tilt-  
288 selective Purkinje cells may themselves be within the dynamic system that generates the tilt position signal,  
289 although their responses remain closer to tilt velocity than position.

290 Our results suggest that the simple-spike output of tilt-selective cells may be temporally integrated by  
291 an intermediate neuronal type. One possibility is that this temporal integration occurs outside the cerebellar  
292 cortex, such that G signals reach translation-selective Purkinje cells through mossy fiber projections from the  
293 vestibular nuclei. We also consider a more parsimonious explanation based on the recently discovered Purkinje  
294 axon collaterals onto the cerebellar cortex (Guo et al. 2016; Witter et al. 2016), such that the temporal  
295 integration may involve granular layer interneurons, e.g., unipolar brush cells (UBCs) and/or granule/Golgi cells.  
296 That UBCs may be involved is supported by both in-vitro (van Dorp and De Zeeuw, 2014; 2015; Locatelli et al.  
297 2013) and in-vivo (Kennedy et al. 2014) findings. UBCs receive extensive synaptic contacts from a single mossy  
298 fiber rosette from either vestibular afferents or vestibular nuclei (Barmack et al. 1992; Diño et al. 2001; Jaarsma  
299 et al. 1996) and exert a powerful excitatory action onto multiple granule cells and other UBCs (Dino et al. 2000;  
300 Nunzi and Mugnaini, 2000). This highly specialized configuration is thought to facilitate prolonged entrapment of  
301 glutamate and broaden the temporal window of activation, thus facilitating temporal transformations (Zampini  
302 et al. 2016).

303 Of particular interest may be calretinin-positive UBCs, which are specifically found in the NU (Kim et al.  
304 2012; Sekerkova et al. 2014) and receive vestibular afferent mossy fibers (Dino et al. 2000). Alternatively, it  
305 could be that the G signal is found in other UBC types or granule interneurons, which perform multimodal  
306 integration (Arenz et al. 2008; 2009; Chabrol et al. 2015; Ishikawa et al. 2015) and receive unusually massive  
307 collaterals from Purkinje cells in the NU (Guo et al. 2016). Feedback connections from the cerebellar nuclei to  
308 the cerebellar cortex may also contribute. For example, some cerebellar nuclei neurons send collaterals back to  
309 the cortex contacting granule and Golgi cells (Ankri et al. 2015; Gao et al. 2016; Houck and Person, 2015).  
310 Furthermore, glutamatergic neurons in the nuclei, in addition to projecting to various premotor and associative  
311 regions of the brain, send axonal collaterals to form mossy fiber-like terminals contacting granule and Golgi cell  
312 dendrites (Houck and Person, 2015). More recently, an inhibitory nucleo-cortical feedback loop was established.  
313 Ankri et al. (2015) found that GABA-glycinergic nuclei neurons form an extensive and divergent plexus of axons,  
314 which contact Golgi cells in the cerebellar granular and molecular layers. Notably, neither rosette-like terminals

315 nor evidence of contacts within cerebellar glomeruli was found. This indicates that they differ both in shape and  
316 location from the excitatory mossy fibers and the glutamatergic nucleo-cortical fibers, both of which form  
317 rosette-like terminals within the glomeruli (Tolbert et al. 1978; Hámori et al. 1980; Batini et al. 1992; Houck and  
318 Person, 2015). It is important that future studies test these hypotheses explicitly.

319

## References

- 320 Albus, J. S. (1971). A theory of cerebellar function. *Mathematical Biosciences*, *10*(1-2), 25-61.
- 321 Angelaki, D. E., McHenry, M. Q., Dickman, J. D., Newlands, S. D., & Hess, B. J. (1999). Computation of inertial  
322 motion: neural strategies to resolve ambiguous otolith information. *Journal of Neuroscience*, *19*(1), 316-327.
- 323 Angelaki, D. E., & Dickman, J. D. (2000). Spatiotemporal processing of linear acceleration: primary afferent and  
324 central vestibular neuron responses. *Journal of neurophysiology*, *84*(4), 2113-2132.
- 325 Angelaki, D. E., Shaikh, A. G., Green, A. M., & Dickman, J. D. (2004). Neurons compute internal models of the  
326 physical laws of motion. *Nature*, *430*(6999), 560.
- 327 Ankri, L., Husson, Z., Pietrajtis, K., Proville, R., Léna, C., Yarom, Y., ... & Uusisaari, M. Y. (2015). A novel inhibitory  
328 nucleo-cortical circuit controls cerebellar Golgi cell activity. *Elife*, *4*, e06262.
- 329 Arenz, A., Silver, R. A., Schaefer, A. T., & Margrie, T. W. (2008). The contribution of single synapses to sensory  
330 representation in vivo. *science*, *321*(5891), 977-980.
- 331 Arenz, A., Brace, E. F., & Margrie, T. W. (2009). Sensory representations in cerebellar granule cells. *Current  
332 opinion in neurobiology*, *19*(4), 445-451.
- 333 Barmack, N. H., Baughman, R. W., & Eckenstein, F. P. (1992). Cholinergic innervation of the cerebellum of rat,  
334 rabbit, cat, and monkey as revealed by choline acetyltransferase activity and immunohistochemistry. *Journal of  
335 Comparative Neurology*, *317*(3), 233-249.
- 336 Batini, C., Compoin, C., Buisseret-Delmas, C., Daniel, H., & Guegan, M. (1992). Cerebellar nuclei and the  
337 nucleocortical projections in the rat: retrograde tracing coupled to GABA and glutamate immunohistochemistry.  
338 *Journal of Comparative Neurology*, *315*(1), 74-84.
- 339 Berniker, M., Voss, M., & Kording, K. (2010). Learning priors for Bayesian computations in the nervous system.  
340 *PloS one*, *5*(9), e12686.
- 341 Berniker, M., & Kording, K. (2011). Bayesian approaches to sensory integration for motor control. *Wiley  
342 Interdisciplinary Reviews: Cognitive Science*, *2*(4), 419-428.
- 343 Borah, J., Young, L. R., & Curry, R. E. (1988). Optimal Estimator Model for Human Spatial Orientation a. *Annals of  
344 the New York Academy of Sciences*, *545*(1), 51-73.
- 345 Bos, J. E., & Bles, W. (2002). Theoretical considerations on canal-otolith interaction and an observer model.  
346 *Biological cybernetics*, *86*(3), 191-207.
- 347 Boyden, E. S., Katoh, A., & Raymond, J. L. (2004). Cerebellum-dependent learning: the role of multiple plasticity  
348 mechanisms. *Annu. Rev. Neurosci.*, *27*, 581-609.
- 349 Brooks, J. X., & Cullen, K. E. (2013). The primate cerebellum selectively encodes unexpected self-motion. *Current  
350 Biology*, *23*(11), 947-955.

- 351 Brooks, J. X., & Cullen, K. E. (2014). Early vestibular processing does not discriminate active from passive self-  
352 motion if there is a discrepancy between predicted and actual proprioceptive feedback. *Journal of*  
353 *neurophysiology*, 111(12), 2465-2478.
- 354 Brooks, J. X., Carriot, J., & Cullen, K. E. (2015). Learning to expect the unexpected: rapid updating in primate  
355 cerebellum during voluntary self-motion. *Nature neuroscience*, 18(9), 1310-1317.
- 356 Cajal, S. R. (1911). *Histologie du système nerveux de l'homme et des vertébrés. Maloine, Paris, 2*, 153-173.
- 357 Carriot, J., Brooks, J. X., & Cullen, K. E. (2013). Multimodal integration of self-motion cues in the vestibular  
358 system: active versus passive translations. *Journal of neuroscience*, 33(50), 19555-19566.
- 359 Chabrol, F. P., Arenz, A., Wiechert, M. T., Margrie, T. W., & DiGregorio, D. A. (2015). Synaptic diversity enables  
360 temporal coding of coincident multisensory inputs in single neurons. *Nature neuroscience*, 18(5), 718.
- 361 Chen-Harris, H., Joiner, W. M., Ethier, V., Zee, D. S., & Shadmehr, R. (2008). Adaptive control of saccades via  
362 internal feedback. *Journal of Neuroscience*, 28(11), 2804-2813.
- 363 Cullen, K. E., Brooks, J. X., Jamali, M., Carriot, J., & Massot, C. (2011). Internal models of self-motion:  
364 computations that suppress vestibular reafference in early vestibular processing. *Experimental brain research*,  
365 210(3-4), 377-388.
- 366 Cullen, K. E. (2012). The vestibular system: multimodal integration and encoding of self-motion for motor  
367 control. *Trends in neurosciences*, 35(3), 185-196.
- 368 Dickman, J. D., & Angelaki, D. E. (2002). Vestibular convergence patterns in vestibular nuclei neurons of alert  
369 primates. *Journal of neurophysiology*, 88(6), 3518-3533.
- 370 Dino, M. R., Schuerger, R. J., Liu, Y. B., Slater, N. T., & Mugnaini, E. (2000). Unipolar brush cell: a potential  
371 feedforward excitatory interneuron of the cerebellum. *Neuroscience*, 98(4), 625-636.
- 372 Diño, M. R., Perachio, A. A., & Mugnaini, E. (2001). Cerebellar unipolar brush cells are targets of primary  
373 vestibular afferents: an experimental study in the gerbil. *Experimental brain research*, 140(2), 162-170.
- 374 van Dorp, S., & De Zeeuw, C. I. (2014). Variable timing of synaptic transmission in cerebellar unipolar brush cells.  
375 *Proceedings of the National Academy of Sciences*, 111(14), 5403-5408.
- 376 van Dorp, S., & De Zeeuw, C. I. (2015). Forward signaling by unipolar brush cells in the mouse cerebellum. *The*  
377 *Cerebellum*, 14(5), 528-533.
- 378 Dugué, G. P., Tihy, M., Gourevitch, B., & Lena, C. (2017). Cerebellar re-encoding of self-generated head  
379 movements. *ELife*, 6, e26179.
- 380 Eccles, J. (1965). Functional meaning of the patterns of synaptic connections in the cerebellum. *Perspectives in*  
381 *biology and medicine*, 8(3), 289-310.

- 382 Eccles, J. C. (1973). The cerebellum as a computer: patterns in space and time. *The Journal of physiology*, 229(1),  
383 1-32.
- 384 Einstein, A. (1907) Über das Relativitätsprinzip und die aus demselben gezogenen Folgerungen. *Jahrbuch der*  
385 *Radioaktivität und Elektronik* 4, 411–462.
- 386 Franklin, D. W., & Wolpert, D. M. (2011). Computational mechanisms of sensorimotor control. *Neuron*, 72(3),  
387 425-442.
- 388 Gao, Z., Proietti-Onori, M., Lin, Z., Michiel, M., Boele, H. J., Potters, J. W., ... & De Zeeuw, C. I. (2016). Excitatory  
389 cerebellar nucleocortical circuit provides internal amplification during associative conditioning. *Neuron*, 89(3),  
390 645-657.
- 391 Glasauer, S., & Merfeld, D. M. (1997). Modelling three-dimensional vestibular responses during complex motion  
392 stimulation. *Three-dimensional kinematics of eye, head and limb movements*, 387-398.
- 393 Graybiel, A. (1952). Oculogravic illusion. *AMA archives of ophthalmology*, 48(5), 605-615.
- 394 Green, A. M., & Angelaki, D. E. (2010). Multisensory integration: resolving sensory ambiguities to build novel  
395 representations. *Current opinion in neurobiology*, 20(3), 353-360.
- 396 Guo, C. C., Ke, M. C., & Raymond, J. L. (2014). Cerebellar encoding of multiple candidate error cues in the service  
397 of motor learning. *Journal of Neuroscience*, 34(30), 9880-9890.
- 398 Guo, C., Witter, L., Rudolph, S., Elliott, H. L., Ennis, K. A., & Regehr, W. G. (2016). Purkinje cells directly inhibit  
399 granule cells in specialized regions of the cerebellar cortex. *Neuron*, 91(6), 1330-1341.
- 400 Hámori, J., & Lakos, I. (1980). Ultrastructural alterations in the initial segments and in the recurrent collateral  
401 terminals of Purkinje cells following axotomy. *Cell and tissue research*, 212(3), 415-427.
- 402 Houck, B. D., & Person, A. L. (2015). Cerebellar premotor output neurons collateralize to innervate the cerebellar  
403 cortex. *Journal of Comparative Neurology*, 523(15), 2254-2271.
- 404 Ishikawa, T., Tomatsu, S., Izawa, J., & Kakei, S. (2016). The cerebro-cerebellum: Could it be loci of forward  
405 models?. *Neuroscience research*, 104, 72-79.
- 406 Ito, M., & Kano, M. (1982). Long-lasting depression of parallel fiber-Purkinje cell transmission induced by  
407 conjunctive stimulation of parallel fibers and climbing fibers in the cerebellar cortex. *Neuroscience letters*, 33(3),  
408 253-258.
- 409 Ito, M. (2000). Mechanisms of motor learning in the cerebellum. *Brain research*, 886(1-2), 237-245.
- 410 Ito, M. (2005). Bases and implications of learning in the cerebellum—adaptive control and internal model  
411 mechanism. *Progress in brain research*, 148, 95-109.

- 412 Jaarsma, D., Dino, M. R., Cozzari, C., & Mugnaini, E. (1996). Cerebellar choline acetyltransferase positive mossy  
413 fibres and their granule and unipolar brush cell targets: a model for central cholinergic nicotinic  
414 neurotransmission. *Journal of neurocytology*, *25*(1), 829-842.
- 415 Karmali, F., & Merfeld, D. M. (2012). A distributed, dynamic, parallel computational model: the role of noise in  
416 velocity storage. *American Journal of Physiology-Heart and Circulatory Physiology*.
- 417 Ke, M. C., Guo, C. C., & Raymond, J. L. (2009). Elimination of climbing fiber instructive signals during motor  
418 learning. *Nature neuroscience*, *12*(9), 1171.
- 419 Kennedy, A., Wayne, G., Kaifosh, P., Alviña, K., Abbott, L. F., & Sawtell, N. B. (2014). A temporal basis for  
420 predicting the sensory consequences of motor commands in an electric fish. *Nature neuroscience*, *17*(3), 416.
- 421 Kim, J. A., Sekerková, G., Mugnaini, E., & Martina, M. (2012). Electrophysiological, morphological, and  
422 topological properties of two histochemically distinct subpopulations of cerebellar unipolar brush cells. *The*  
423 *Cerebellum*, *11*(4), 1012-1025.
- 424 Körding, K. P., & Wolpert, D. M. (2004). Bayesian integration in sensorimotor learning. *Nature*, *427*(6971), 244.
- 425 Laurens, J., & Droulez, J. (2007). Bayesian processing of vestibular information. *Biological cybernetics*, *96*(4), 389-  
426 404.
- 427 Laurens, J., Straumann, D., & Hess, B. J. (2010). Processing of angular motion and gravity information through an  
428 internal model. *American Journal of Physiology-Heart and Circulatory Physiology*.
- 429 Laurens, J., Strauman, D., & Hess, B. J. (2011). Spinning versus wobbling: how the brain solves a geometry  
430 problem. *Journal of Neuroscience*, *31*(22), 8093-8101.
- 431 Laurens, J., & Angelaki, D. E. (2011). The functional significance of velocity storage and its dependence on  
432 gravity. *Experimental brain research*, *210*(3-4), 407-422.
- 433 Laurens, J., Meng, H., & Angelaki, D. E. (2013a). Computation of linear acceleration through an internal model in  
434 the macaque cerebellum. *Nature neuroscience*, *16*(11), 1701.
- 435 Laurens, J., Meng, H., & Angelaki, D. E. (2013b). Neural representation of orientation relative to gravity in the  
436 macaque cerebellum. *Neuron*, *80*(6), 1508-1518.
- 437 Laurens, J., & Angelaki, D. E. (2017). A unified internal model theory to resolve the paradox of active versus  
438 passive self-motion sensation. *Elife*, *6*, e28074.
- 439 Laurens, J., Liu, S., Yu, X. J., Chan, R., Dickman, D., DeAngelis, G. C., & Angelaki, D. E. (2017). Transformation of  
440 spatiotemporal dynamics in the macaque vestibular system from otolith afferents to cortex. *Elife*, *6*, e20787.
- 441 Lee, R. X., Huang, J. J., Huang, C., Tsai, M. L., & Yen, C. T. (2015). Plasticity of cerebellar Purkinje cells in  
442 behavioral training of body balance control. *Frontiers in systems neuroscience*, *9*, 113.



- 443 Lim, K., Karmali, F., Nicoucar, K., & Merfeld, D. M. (2017). Perceptual precision of passive body tilt is consistent  
444 with statistically optimal cue integration. *Journal of Neurophysiology*, 117(5), 2037-2052.
- 445 Locatelli, F., Botta, L., Prestori, F., Masetto, S., & D'Angelo, E. (2013). Late-onset bursts evoked by mossy fibre  
446 bundle stimulation in unipolar brush cells: evidence for the involvement of H-and TRP-currents. *The Journal of*  
447 *physiology*, 591(4), 899-918.
- 448 Marr, D. (1969). A theory of cerebellar cortex. *The Journal of physiology*, 202(2), 437-470.
- 449 Mayne, R. (1974). A systems concept of the vestibular organs. In Vestibular system part 2: psychophysics,  
450 applied aspects and general interpretations (pp. 493-580). Springer Berlin Heidelberg.
- 451 Merfeld, D. M., Young, L. R., Paige, G. D., & Tomko, D. L. (1993). Three dimensional eye movements of squirrel  
452 monkeys following postrotatory tilt. *Journal of vestibular research: equilibrium & orientation*.
- 453 Merfeld, D. M. (1995). Modeling the vestibulo-ocular reflex of the squirrel monkey during eccentric rotation and  
454 roll tilt. *Experimental Brain Research*, 106(1), 123-134.
- 455 Merfeld, D. M., Zupan, L., & Peterka, R. J. (1999). Humans use internal models to estimate gravity and linear  
456 acceleration. *Nature*, 398(6728), 615.
- 457 Nguyen-Vu, T. B., Kimpo, R. R., Rinaldi, J. M., Kohli, A., Zeng, H., Deisseroth, K., & Raymond, J. L. (2013).  
458 Cerebellar Purkinje cell activity drives motor learning. *Nature neuroscience*, 16(12), 1734.
- 459 Nunzi, M. G., & Mugnaini, E. (2000). Unipolar brush cell axons form a large system of intrinsic mossy fibers in the  
460 postnatal vestibulocerebellum. *Journal of Comparative Neurology*, 422(1), 55-65.
- 461 Oman, C. M. (1982). A heuristic mathematical model for the dynamics of sensory conflict and motion sickness.  
462 *Acta Oto-Laryngologica*, 94(sup392), 4-44.
- 463 Palay, S. L., & Chan-Palay, V. (1976, January). A guide to the synaptic analysis of the neuropil. In Cold Spring  
464 Harbor symposia on quantitative biology (Vol. 40, pp. 1-16). Cold Spring Harbor Laboratory Press.
- 465 Popa, L. S., Hewitt, A. L., & Ebner, T. J. (2012). Predictive and feedback performance errors are signaled in the  
466 simple spike discharge of individual Purkinje cells. *Journal of Neuroscience*, 32(44), 15345-15358.
- 467 Popa, L. S., Hewitt, A. L., & Ebner, T. J. (2013). Purkinje cell simple spike discharge encodes error signals  
468 consistent with a forward internal model. *The Cerebellum*, 12(3), 331-333.
- 469 Popa, L. S., Streng, M. L., Hewitt, A. L., & Ebner, T. J. (2016). The errors of our ways: understanding error  
470 representations in cerebellar-dependent motor learning. *The Cerebellum*, 15(2), 93-103.
- 471 Popa, L. S., Streng, M. L., & Ebner, T. J. (2017). Long-term predictive and feedback encoding of motor signals in  
472 the simple spike discharge of Purkinje cells. *Eneuro*, 4(2).
- 473 Roy, J. E., & Cullen, K. E. (2004). Dissociating self-generated from passively applied head motion: neural  
474 mechanisms in the vestibular nuclei. *Journal of Neuroscience*, 24(9), 2102-2111.

- 475 Ruigrok, T. J. (2011). Ins and outs of cerebellar modules. *The cerebellum*, 10(3), 464-474.
- 476 Sağlam, M., Lehnen, N., & Glasauer, S. (2011). Optimal control of natural eye-head movements minimizes the  
477 impact of noise. *Journal of Neuroscience*, 31(45), 16185-16193.
- 478 Sağlam, M., Glasauer, S., & Lehnen, N. (2014). Vestibular and cerebellar contribution to gaze optimality. *Brain*,  
479 137(4), 1080-1094.
- 480 Sekerková, G., Watanabe, M., Martina, M., & Mugnaini, E. (2014). Differential distribution of phospholipase C  
481 beta isoforms and diacylglycerol kinase-beta in rodents cerebella corroborates the division of unipolar brush cells  
482 into two major subtypes. *Brain Structure and Function*, 219(2), 719-749.
- 483 Shadmehr, R., Smith, M. A., & Krakauer, J. W. (2010). Error correction, sensory prediction, and adaptation in  
484 motor control. *Annual review of neuroscience*, 33, 89-108.
- 485 Shaikh, A. G., Green, A. M., Ghasia, F. F., Newlands, S. D., Dickman, J. D., & Angelaki, D. E. (2005). Sensory  
486 convergence solves a motion ambiguity problem. *Current biology*, 15(18), 1657-1662.
- 487 Stay, T. L., Laurens, J., Sillitoe, R. V., & Angelaki, D. E. (2019). Genetically eliminating Purkinje neuron GABAergic  
488 neurotransmission increases their response gain to vestibular motion. *Proceedings of the National Academy of  
489 Sciences*, 201818819.
- 490 Streng, M. L., Popa, L. S., & Ebner, T. J. (2018). Modulation of sensory prediction error in Purkinje cells during  
491 visual feedback manipulations. *Nature communications*, 9(1), 1099.
- 492 Todorov, E. (2004). Optimality principles in sensorimotor control. *Nature neuroscience*, 7(9), 907.
- 493 Tolbert, D. L., Bantli, H., & Bloedel, J. R. (1978). Organizational features of the cat and monkey cerebellar  
494 nucleocortical projection. *Journal of Comparative Neurology*, 182(1), 39-56.
- 495 Voogd, J. (2011). Cerebellar zones: a personal history. *The cerebellum*, 10(3), 334-350.
- 496 Yakusheva, T. A., Shaikh, A. G., Green, A. M., Blazquez, P. M., Dickman, J. D., & Angelaki, D. E. (2007). Purkinje  
497 cells in posterior cerebellar vermis encode motion in an inertial reference frame. *Neuron*, 54(6), 973-985.
- 498 Yakusheva, T., Blazquez, P. M., & Angelaki, D. E. (2008). Frequency-selective coding of translation and tilt in  
499 macaque cerebellar nodulus and uvula. *Journal of Neuroscience*, 28(40), 9997-10009.
- 500 Yakusheva, T., Blazquez, P. M., & Angelaki, D. E. (2010). Relationship between complex and simple spike activity  
501 in macaque caudal vermis during three-dimensional vestibular stimulation. *Journal of Neuroscience*, 30(24),  
502 8111-8126.
- 503 Yakusheva, T., Angelaki, D.E., & Blazquez, P. M. (2013) Inactivation of GABA-B receptors in the cerebellar  
504 nodulus and uvula changes vestibular responses of Purkinje cells. Program No. 164.09/MM1, Neuroscience  
505 Meeting Planner. Society for Neuroscience Meeting, San Diego.

- 506 Witter, L., Rudolph, S., Pressler, R. T., Lahlaf, S. I., & Regehr, W. G. (2016). Purkinje cell collaterals enable output  
507 signals from the cerebellar cortex to feed back to Purkinje cells and interneurons. *Neuron*, *91*(2), 312-319.
- 508 Wolpert, D. M., Ghahramani, Z., & Jordan, M. I. (1995). An internal model for sensorimotor integration. *Science*,  
509 *269*(5232), 1880.
- 510 Wolpert, D. M., & Kawato, M. (1998). Multiple paired forward and inverse models for motor control. *Neural*  
511 *networks*, *11*(7-8), 1317-1329.
- 512 Zampini, V., Liu, J. K., Diana, M. A., Maldonado, P. P., Brunel, N., & Dieudonné, S. (2016). Mechanisms and  
513 functional roles of glutamatergic synapse diversity in a cerebellar circuit. *ELife*, *5*, e15872.
- 514 Zupan, L. H., Merfeld, D. M., & Darlot, C. (2002). Using sensory weighting to model the influence of canal, otolith  
515 and visual cues on spatial orientation and eye movements. *Biological cybernetics*, *86*(3), 209-230.

516

## Methods

### 517 ***Animals***

518 Three male rhesus Macaques, aged 3, 4 and 9 years, were used in the study. Animals were pair-housed  
519 in a vivarium under normal day/night cycle illumination. Animals were implanted under isoflurane anesthesia  
520 with a circular delrin ring to immobilize the head, scleral search coils to measure eye movements and a delrin  
521 platform for neural recordings. Experimental procedures were in accordance with US National Institutes of  
522 Health guidelines and approved by the Animal Studies Committee at Washington University in St Louis (approval  
523 n°20100230) and Baylor College of Medicine (protocol n°AN-5795).

524

### 525 ***Experimental setup and neuronal recordings***

526 Experimental procedures were similar as in previous studies (Yakusheva et al. 2007; Laurens et al.  
527 2013a,b). Primates sat comfortably in a primate chair that was installed in the center of a 3-axis rotator  
528 mounted on a linear sled (Acutronics Inc, Pittsburg, PA) such that the three rotation axes intersected at the  
529 center of the head. Neurons were recorded extracellularly using epoxy-coated tungsten microelectrodes (5 or 20  
530 MΩ impedance; FHC, Bowdoinham, ME), acquired at 33kHz using a data acquisition board (1401, Cambridge  
531 Electronic Design, Cambridge, UK) and stored for offline analysis. Spike sorting used a custom Matlab script  
532 (MathWorks) by manually clustering spikes based on spike amplitude and principal components analysis.

533 The location of lobules X and IX of the caudal vermis was determined based on stereotaxic coordinates  
534 as well as the location of the abducens nucleus. Recordings were performed in the Purkinje cell layer where  
535 complex spikes activity could be observed online. Complex spikes were further identified offline in 33/46 cells,  
536 and simple spike activity was observed to pause for at least 15ms in 30/33 cells.

537

### 538 ***Experimental protocol***

539 Once neural activity was isolated, we used sinusoidal tilt and translation stimuli (0.5Hz, 0.2G amplitude;  
540 as in Shaikh et al. 2005; Yakusheva et al. 2007; Laurens et al. 2013a,b) to determine online whether the cell  
541 responded preferentially to tilt or translation using motion along multiple axes (naso-occipital, inter-aural or  
542 intermediate). Because our focus was on tilt- or translation-selective neurons, only cells with a clear modulation  
543 during tilt-translation were further tested using a series of transient stimuli along the cell's preferred direction.

544 The transient motion profiles were generated by computing the derivative of a Gaussian function with  
545 standard deviation  $\sigma = 250\text{ms}$ . This resulted in a biphasic signal that was scaled to an amplitude of  $\pm 5.6^\circ$  to  
546 generate the tilt position stimulus, and to an amplitude of  $\pm 0.93\text{m/s}^2$  to generate the linear acceleration  
547 stimulus. A tilt-translation stimulus was created by applying tilt and translation stimuli simultaneously so that

548 the resultant gravito-inertial acceleration was null. Each stimulus type (tilt, translation and tilt-translation) was  
549 applied 15 times in two opposite directions. Longer duration stimuli were generated by setting  $\sigma$  to 500ms, and  
550 the peak tilt and linear acceleration amplitudes to  $\pm 9.8^\circ$  and  $\pm 1.67\text{m/s}^2$ .

551

### 552 **Sample size**

553 In line with standard practices in extracellular studies in non-human primates, we aimed at collecting a  
554 sample of over 40 neurons in over 2 animals. Our final sample includes 46 neurons in 3 animals.

555

### 556 **Data analysis**

557 Neuronal responses were analyzed using a linear model schematized in **Fig. 1 Suppl. 1**. We computed a  
558 peri-stimulus time histogram (time  $t$  ranging from -2s to 2s by increments of 12 ms, total of 333 bins) for each  
559 stimulus type (Tilt, Translation, Tilt-Translation) and motion direction (positive or negative).

560 As shown by Laurens et al. (2017), neural responses to translation are dynamically complex, consisting  
561 of both spatially-tuned (direction-selective) and spatially-untuned (omnidirectional) components. For illustration  
562 purpose (and separately from the linear regression analysis described below), the direction-selective  
563 components can be visualized by computing the difference between the firing rates measured during motion in  
564 both direction ( $\Delta\text{FR} = (\text{FR}_{\text{PD}} - \text{FR}_{\text{Anti-PD}})/2$ ), where  $\text{FR}_{\text{PD}}$  and  $\text{FR}_{\text{Anti-PD}}$  are the cell's firing along its preferred motion  
565 direction (PD) or in the opposite direction (Anti-PD). A cell's PD refers to its direction-selective modulation, and  
566 is defined as the direction along which tilt-selective neurons increase their firing in response to positive tilt  
567 velocity and translation-selective neurons increase their firing in response to positive acceleration. The  
568 omnidirectional component can be visualized by computing the average firing across both directions.

569 To characterize response dynamics, we used multiple linear regression. Specifically, we decomposed tilt  
570 into 4 dynamic components (**Fig. 1 Suppl. 1**): tilt position ( $G$ ), tilt velocity ( $dG/dt$ , abbreviated  $dG$ ), tilt  
571 acceleration ( $d^2G/dt^2$ , abbreviated  $d^2G$ ) and the integral of tilt position ( $\int G \cdot dt$ , abbreviated  $\int G$ ). Likewise, we  
572 decomposed linear acceleration into ( $\int A$ ,  $A$ ,  $dA$ ,  $d^2A$ , i.e. linear velocity, acceleration, jerk and jerk derivative  
573 respectively; **Fig. 1 Suppl. 1**). As shown by Laurens et al. (2017), neural response may include omnidirectional  
574 components, where cells respond identically (e.g. by an increase in firing rate) irrespective of motion direction.  
575 To quantify these response components, we added 8 additional regressors ( $\int G^0$ ,  $G^0$ , etc...) which were identical  
576 to their counterpart ( $\int G$ ,  $G$ , etc..., also referred to as "direction-dependent") but did not reverse sign for  
577 opposite motion directions (**Fig. 1 Suppl. 1**, "Omnidirectional motion variables"). Next, we performed a series of  
578 linear regressions where all peri-stimulus time histograms (along all directions, i.e. we didn't extract the

579 direction-selective and omnidirectional components prior to this analysis) were simultaneously fitted with either  
580 all or a subset of these 16 variables.

581

582 *Composite model:* The first regression, which included all variables, the *composite* model, followed the  
583 equation:

$$584 \text{FR}_{\text{comp}}(t) = k_{JG} \cdot X_{JG}(t) + k_G \cdot X_G(t) + k_{dG} \cdot X_{dG}(t) + k_{d2G} \cdot X_{d2G}(t) + k_{JA} \cdot X_{JA}(t) + k_A \cdot X_A(t) + k_{dA} \cdot X_{dA}(t) + k_{d2A} \cdot X_{d2A}(t) \\ 585 + \text{FR}_0 + \text{FR}^0(t)$$

586 in this equation,  $\text{FR}_0$  is the cell's baseline firing rate, and the omnidirectional motion variables have been  
587 grouped in a variable  $\text{FR}^0(t)$ :

$$588 \text{FR}^0(t) = k_{JG}^0 \cdot X_{JG}^0(t) + k_G^0 \cdot X_G^0(t) + k_{dG}^0 \cdot X_{dG}^0(t) + k_{d2G}^0 \cdot X_{d2G}^0(t) + k_{JA}^0 \cdot X_{JA}^0(t) + k_A^0 \cdot X_A^0(t) + k_{dA}^0 \cdot X_{dA}^0(t) + \\ 589 k_{d2A}^0 \cdot X_{d2A}^0(t)$$

590 The regression coefficients ( $k_{JG}$ ,  $k_G$ ,  $k_{dG}$ , etc...) were used to evaluate the neurons' response gain to G,  
591 dG, etc. Note that the composite model included 16 temporal variables that are all linearly independent  
592 (therefore the system was not overdetermined) and are all statistically orthogonal when only tilt and translation  
593 motion are considered. This property ensures that the composite model is not prone to overfitting. Note also  
594 that the purpose of this analysis was not to demonstrate that neuronal responses could be fitted accurately  
595 (which would not be very remarkable, considering the large number of variables used in the model), but to  
596 investigate which variables contributed to the neuron's response.

597 The neuronal response gains may not be directly compared across dynamic components since they are  
598 expressed in different units (e.g. spk/s/G for A and G, spk/s/(G/s) for dA and dG). To convert them to identical  
599 units, we scaled the regression coefficients ( $k_{JG}$ ,  $k_G$ ,  $k_{dG}$ , etc...) by the peak to trough amplitude of the motion  
600 variables ( $X_{JG}$ ,  $X_G$ ,  $X_{dG}$ ...), resulting in "signed" peak-to-trough response amplitudes (in spk/s) that can be  
601 compared across dynamic components (**Fig. 4D, G**). In **Fig. 4E, H**, the temporal profiles of tilt-selective (or  
602 translation-selective) cells are computed as the average values of  $|k_{dG}|$  and  $|k_G|$  ( $|k_{dA}|$  and  $|k_A|$  respectively)  
603 multiplied by the temporal profiles of  $X_{dG}$  and  $X_G$  ( $X_{dA}$  and  $X_A$  respectively).

604

605 *Partial correlation analysis:* In order to evaluate how well a single motion variable or a group of variables  
606 (e.g. JG and JA) contributes to a neuron's response, we re-fitted the firing rate after eliminating the motion  
607 variable (or group of variables). The partial coefficient of determination ( $pR^2$ ) of this group of variables is  
608 computed as:

$$609 pR^2_{JG/JA} = (R^2_{\text{comp}} - R^2_{-(JG/JA)}) / (1 - R^2_{-(JG/JA)})$$

610 Where  $R^2_{-(JG/JA)}$  is the coefficient of determination after  $k_{JG} \cdot X_{JG}(t)$  and  $k_{JA} \cdot X_{JA}(t)$  are removed from the  
611 composite model.

612 Note that this computation was also done for pair of variables with identical dynamic components (JG  
613 and JA; G and A; etc) in order to quantify the cells' dynamics irrespectively of whether cells preferentially  
614 responded to tilt, translation or GIA (**Fig. 3B,C**). In addition, we also computed the partial  $R^2$  of all direction-  
615 dependent components together ( $pR^2_{\text{direction-dependant}}$ ), as well as the partial  $R^2$  of all omnidirectional components  
616 ( $pR^2_{\text{omnidirectional}}$ ) (**Fig. 3 Suppl. 1F**).

617

618 *Neuronal response classification:* Following a similar approach as in Laurens and Angelaki 2013b, we  
619 performed additional regressions based on subset of motion variables to classify the cells as tilt-selective,  
620 translation-selective, GIA-selective or composite. We fitted  $FR(t)$  with simpler models that assume that the  
621 neuron responds exclusively to tilt, translation or the GIA:

622 
$$FR_{\text{tilt}}(t) = k_{JG} \cdot X_{JG}(t) + k_G \cdot X_G(t) + k_{dG} \cdot X_{dG}(t) + k_{d2G} \cdot X_{d2G}(t) + FR_0 + FR^0(t)$$

623 
$$FR_{\text{trans}}(t) = k_{JA} \cdot X_{JA}(t) + k_A \cdot X_A(t) + k_{dA} \cdot X_{dA}(t) + k_{d2A} \cdot X_{d2A}(t) + FR_0 + FR^0(t)$$

624 
$$FR_{\text{GIA}}(t) = k_{JGIA} \cdot (X_{JG}(t) + X_{JA}(t)) + k_{GIA} \cdot (X_G(t) + X_A(t)) + k_{dGIA} \cdot (X_{dG}(t) + X_{dA}(t)) + k_{d2GIA} \cdot (X_{d2G}(t) + X_{d2A}(t)) + FR_0 + FR^0(t)$$

625 The quality of each model's fit was evaluated by computing coefficients of determination  $R^2_{\text{tilt}}$ ,  $R^2_{\text{trans}}$ ,  
626  $R^2_{\text{GIA}}$ . A neuron was classified as tilt-, translation- or GIA selective if its  $R^2$  was significantly ( $p < 0.01$ ) higher than  
627 the  $R^2$  of the two other models; the p-value was computed using a bootstrap procedure (as in Laurens and  
628 Angelaki 2013b). If no component was significantly higher than the others, the neuron was classified as  
629 composite. Any neuron where  $pR^2_{\text{direction-dependant}} < 0.3$  was classified as non-responsive.

630 Note that cells were classified based on their "direction-dependent" response alone. Indeed, although  
631 the omnidirectional response component may also encode tilt, translation or GIA, these response components  
632 were captured by the term  $FR^0(t)$  which was included in all the models above. Therefore, these models did fit  
633 the omnidirectional response equally well, and differed only by their ability to fit the direction-dependent  
634 responses.

635 A similar procedure was performed to classify omnidirectional responses (**Fig. 3S1, Suppl. Table 2**).

636

637 *Kalman filter model:* The Kalman filter model in Laurens and Angelaki 2017 computes optimal estimates  
638 of rotation velocity, tilt and translation during active and passive motion. In **Fig. 5**, we have outlined a simplified  
639 version, which is restricted to estimating tilt and translation during passive movement. This model implements  
640 the computations outlined in **Fig. 1C**, i.e. **eq. 1-3** (see Laurens and Angelaki 2017 for details). Note that the  
641 model incorporates an otolith feedback that updates the tilt estimate (somatogravic feedback), see **Fig. 5 Suppl.**



642 **1.** In the absence of canal inputs, i.e.  $\Omega=0$ , **eq. 1'** implements a low-pass filter. This corresponds to a well-known  
643 illusion where tilt sensation follows otolith signal at low frequencies (Graybiel, 1952). This term has only a minor  
644 contribution for the stimuli used, as shown in **Fig. 5 Suppl. 1** (compare the simulations of **eq. 1** and **eq. 1'**).

645

646 *Neuronal network simulations:* We simulated a putative cerebellar circuitry where the firing rate of tilt-  
647 selective Purkinje cells ( $FR_{TiltPC}$ ), interneurons ( $FR_{TiltPos}$ ) and translation-selective Purkinje cells ( $FR_{TransPC}$ )  
648 implement  $dG/dt$ ,  $G$  and  $A$ , respectively. We assumed that tilt-selective Purkinje cells compute an optimal  
649 estimate of tilt velocity by implementing **eq. 1'** (**Fig. 5**). Accordingly, we model these cells using eq. 1'' below,  
650 which is a direct transcription of **eq. 1'**:

$$651 \quad FR_{TiltPC} = Gx\Omega + 1/\tau_s \cdot FR_{TransPC} \quad (\text{eq. 1''})$$

652 Ideally, neurons that encode tilt should implement **eq. 2** by integrating tilt velocity signals provided by  
653 tilt-selective Purkinje cells inputs to compute gravity. However, **eq. 2** ( $G=\int dG.dt$ ) stipulates that  $dG$  signals should  
654 be integrated perfectly, but this might not be practically feasible. In fact, because the integration of semicircular  
655 canal signals into an internal estimate of  $G$  occurs at high frequencies (as shown in Laurens et al. 2013b),  
656 whereas the somatogravic feedback dominates this estimate at low frequencies, we reasoned that a leaky  
657 integrator would approximate **eq. 2** closely:

$$658 \quad dFR_{TiltPos}/dt = FR_{TiltPC} - 1/\tau_{TiltPos} \cdot FR_{TiltPos} \quad (\text{eq. 2''})$$

659 Finally, we assume that translation-selective cells implement **eq. 3**, and accordingly we model these cells  
660 using eq. 3'' below, which is a direct transcription of **eq. 3**:

$$661 \quad FR_{TransPC} = GIA - FR_{TiltPos} \quad (\text{eq. 3''})$$

662 We set  $\tau_s = 0.5s$  and  $\tau_{TiltPos} = 1s$  and simulated the network's dynamics during transient motion stimuli as  
663 well as static tilt (**Fig. 6B-F**).

664

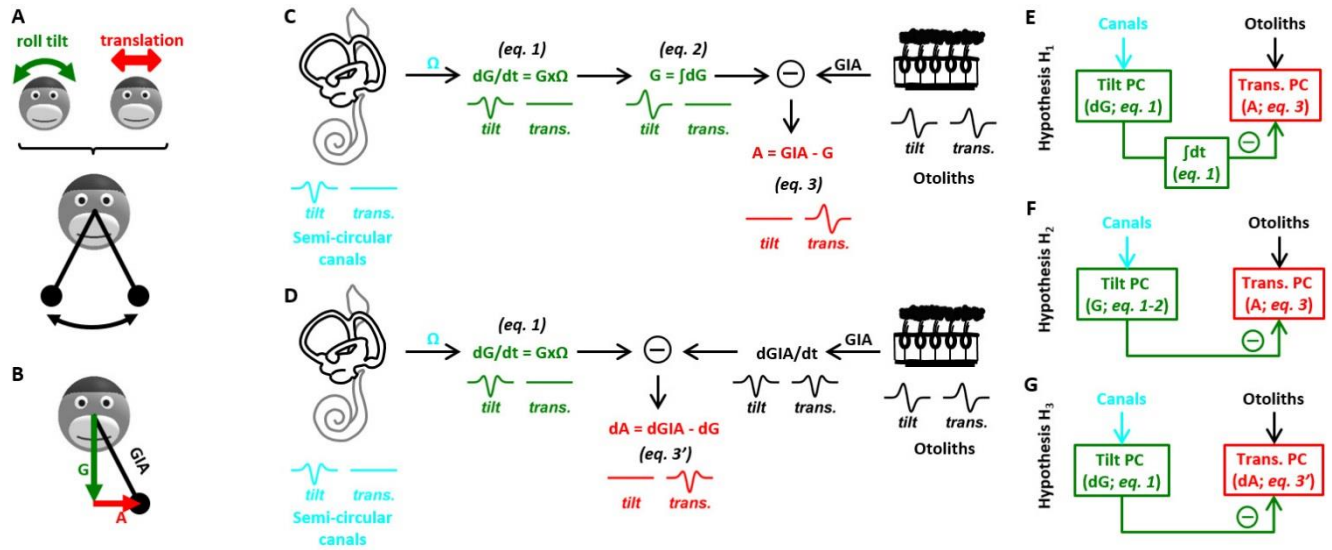

665

666

667

668

669

670

671

672

673

674

675

**Figure 1: Internal model of head motion for resolving the tilt/translation ambiguity.** (A) Illustration of the ambiguity: the otolith organs are analogous to a pendulum fixed to the head that swings identically during roll tilt and lateral translation. Thus, the otoliths detect both stimuli but do not discriminate them. (B) Illustration of the gravito-inertial force vector. (C) Simplified model of tilt/translation discrimination (from Laurens and Angelaki 2011). (D) Alternative architecture for tilt/translation discrimination. (E-G) Hypotheses ( $H_1$ ,  $H_2$ ,  $H_3$ ) of how internal model variables are represented in simple spike responses. The temporal waveforms shown are further detailed in **Fig. 1 Suppl. 1**, which shows a decomposition of the motion stimuli into dynamic components.

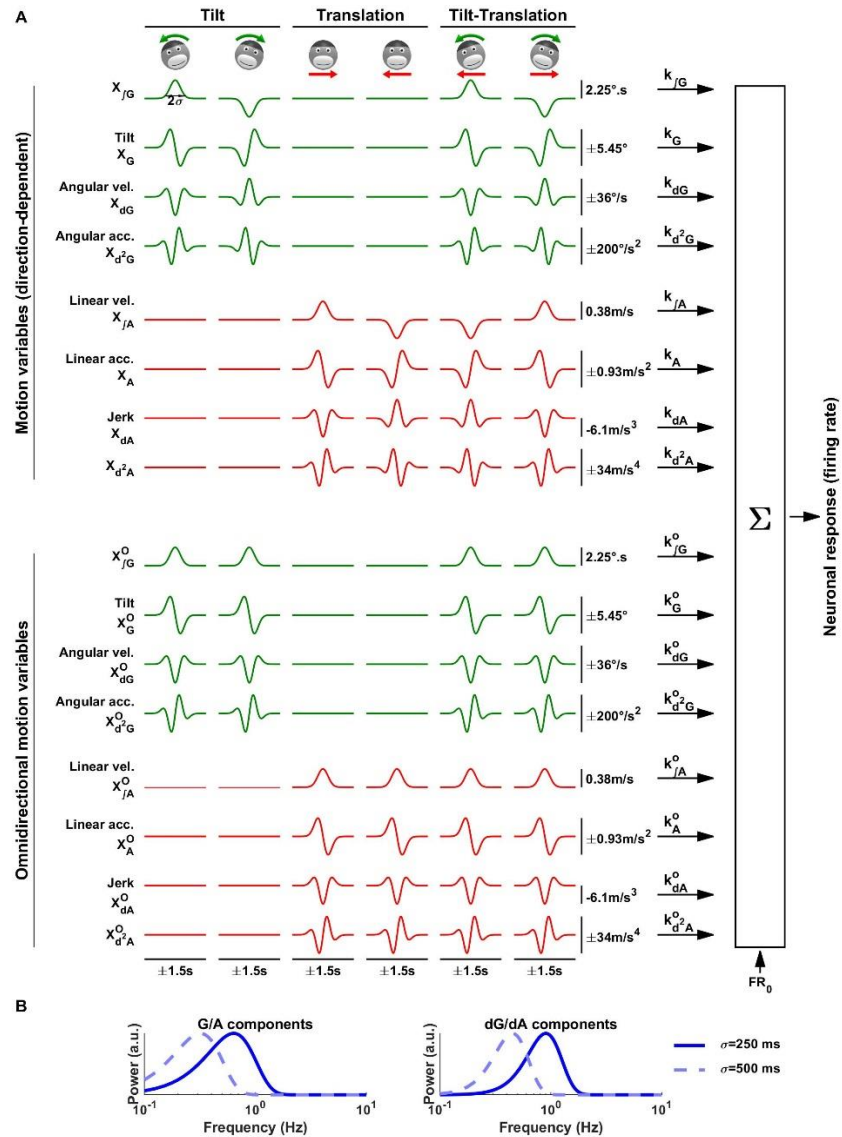

676

677 **Figure 1 Supplement 1: Dynamics of the transient motion stimuli. (A)** Decomposition of the motion stimuli and  
 678 neuronal responses into dynamic components. Motion stimuli are illustrated on top (assuming lateral motion;  
 679 similar stimuli were also applied in the forward/backward or intermediate directions). Arrows represent the  
 680 direction of the first phase of the biphasic tilt or linear acceleration profiles. Upper half: Motion variables. Tilt (G)  
 681 and linear acceleration (A) follow biphasic profiles that can be integrated into  $\int G$  and  $\int A$  or derivated into  $dG/dA$   
 682 and  $d^2G/d^2A$ . The corresponding temporal profiles during tilt, translation and tilt-translation in both directions  
 683 (with  $\sigma=250ms$ ) are represented. Lower half: Omnidirectional motion variables. We define omnidirectional  
 684 variables that follow the same dynamics as the motion variables, but whose sign doesn't reverse when the  
 685 direction of motion is changed. Neuronal responses are modeled as linear combinations of these components.  
 686 **(B)** Power spectra of the G/A and dG/dA components.

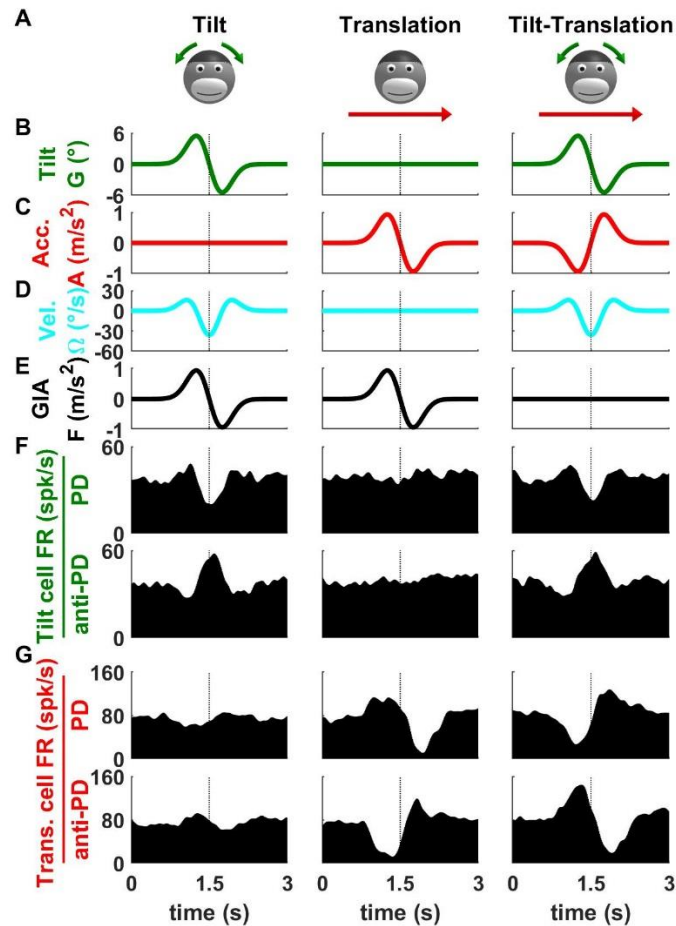

687

688 **Figure 2: Example tilt- and translation-selective Purkinje cell responses** during tilt, translation and  
 689 tilt-translation. (A) Illustration of the motion stimuli. (B-C) Temporal profiles of the gravitational (i.e. tilt, B) and  
 690 translational acceleration (C) component of the motion stimuli. (D-E) Temporal profiles of the physical variables  
 691 sensed by the vestibular system: the tilt velocity (D) is detected by the semicircular canals and the gravito-  
 692 inertial acceleration (GIA) (E) is detected by the otoliths. (F-G) Firing rate (FR) of a tilt-selective and translation-  
 693 selective Purkinje cell. The upper and lower rows display the neuronal responses in the Preferred Direction (PD)  
 694 and in the opposite direction (anti-PD), respectively. The PD is defined as the direction along which tilt-selective  
 695 neurons increase their firing in response to positive tilt velocity and translation-selective neurons increase their  
 696 firing in response to positive acceleration. Data shown in response to transient stimuli with  $\sigma = 250$  ms.

697

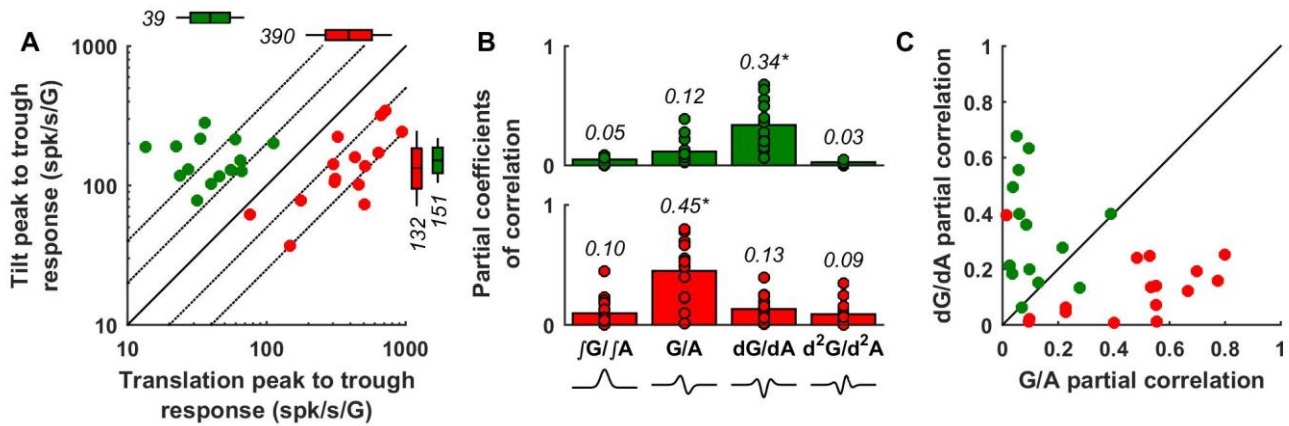

698

699 **Figure 3: Dynamic response components of tilt (green) and translation (red) Purkinje cells. (A)** Scatter plot of  
700 peak-to-trough response amplitude (in spk/s/G) during tilt and translation. The box and whisker plots indicate  
701 geometric mean (center of boxes), 95% confidence intervals (boxes) and standard deviation (whiskers). **(B)**  
702 Partial coefficients of correlation of the  $JG/JA$ ,  $G/A$ ,  $dG/dA$  and  $d^2G/d^2A$  components (whose waveforms are  
703 illustrated at the bottom of the panel) in tilt (upper panel, green) and translation Purkinje cells (lower panel,  
704 red). Dots: individual cells, bars: population average. **(C)** Comparison of the partial correlation coefficients of  
705 biphasic ( $G/A$ ) and triphasic ( $dG/dA$ ) response components in tilt and translation selective Purkinje cells. Note  
706 that this analysis is agnostic to whether the cell encodes tilt or translation (because the  $G$  profile during tilt  
707 matches exactly the  $A$  profile during translation). Yet, it gives different answers for the two cell types –  
708 suggesting different dynamics. Data shown in response to transient stimuli with  $\sigma = 250$  ms. All analyses are  
709 based on direction-dependent responses; summary of omnidirectional modulation responses is shown in **Fig. 3**  
710 **Suppl. 1.**

711

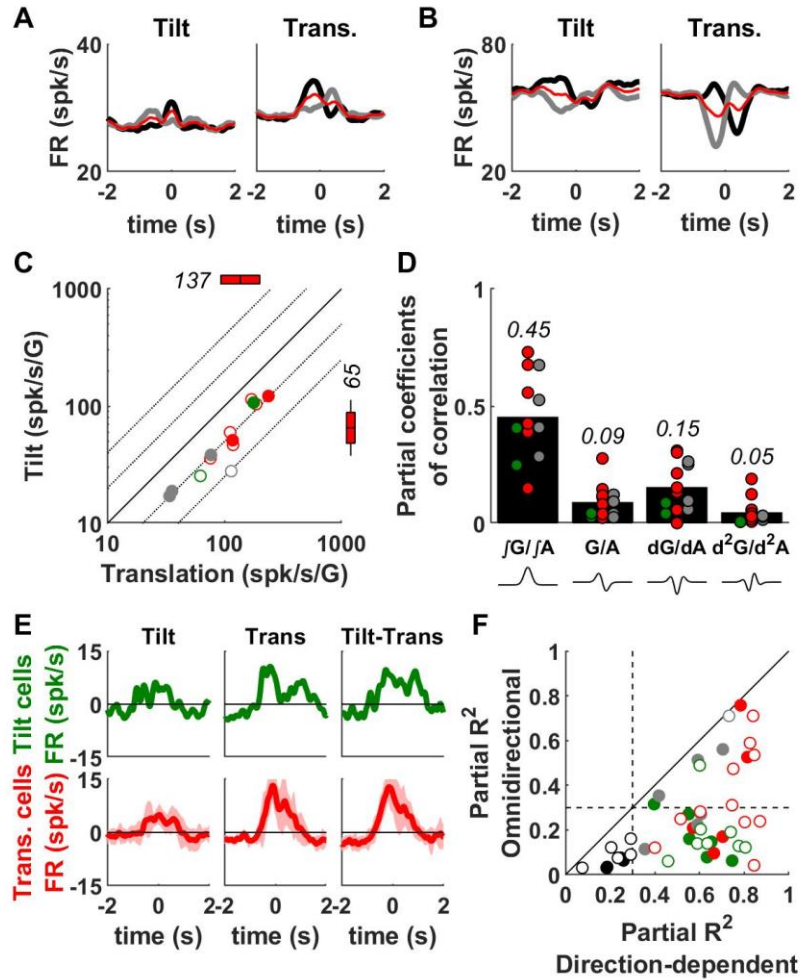

712

713 **Figure 3 Supplement 1: Omnidirectional modulation.** In general, neuronal responses reverse when stimulus  
 714 direction is reversed, but this is not typically the case with vestibular neurons tuned to translation, which have a  
 715 large contribution of omnidirectional tuning (Laurens et al., 2017). The direction-dependent neuronal  
 716 modulation can be visualized by computing the difference in firing rate between opposite motion directions  
 717 ( $\Delta$ FR, see Methods). In contrast, averaging the firing rate across motion directions reveals an omnidirectional  
 718 response (see Methods). Omnidirectional responses are evaluated using the same statistical approach as  
 719 direction-dependent responses (see Methods). A total of 13/46 cells exhibit significant omnidirectional  
 720 responses (**Suppl. Table 2**). Their properties are summarized here. **(A)** Firing rate of a translation-selective cell  
 721 during tilt and translation, along the PD (black) and anti-PD (grey). The average of these two curves (red) exhibits  
 722 a positive omnidirectional response during translation. **(B)** Firing rate of another translation-selective cell  
 723 exhibiting a negative omnidirectional response during translation. **(C)** Peak-to-trough amplitude of the omnidirectional responses  
 724 during tilt versus translation. The color code indicates the cells' classification based on direction-dependent  
 725 responses (green: tilt-selective, red: translation-selective, gray: composite). Positive and negative

726 omnidirectional modulations are indicated by filled and open symbols, respectively. Omnidirectional modulation  
727 is larger during translation than during tilt ( $p = 2.10^{-4}$ , paired Wilcoxon test across all cells,  $n=13$ , with significant  
728 omnidirectional responses). The boxes and whiskers represent the geometric mean, confidence interval (boxes)  
729 and standard deviation (whiskers) of the response gain of translation-selective cells (other cells types are not  
730 shown due to the low number of responsive cells). **(D)** The omnidirectional response component followed  
731 mostly  $\int G/\int A$  dynamics. At the population level (tilt-, translation-selective and composite cells pooled), the  
732 partial coefficient of correlation of the  $\int G/\int A$  component was higher than that of other components (multiple  
733 Wilcoxon signed rank test, Bonferroni correction,  $p < 10^{-3}$ ,  $n = 13$ ). **(E)** Average omnidirectional response in tilt-  
734 ( $n=2$ ) and translation-selective ( $n=7$ ) cells. The sign of the modulation was inverted prior to averaging in cells  
735 where the modulation is negative. In agreement with panels (C) and (D), the modulation is higher during  
736 translation than tilt and follows a monophasic profile characteristic of the  $\int G/\int A$  dynamic component (**Fig. S1**).  
737 Note that the modulation does not reverse during tilt-translation compared to translation, even though the  
738 direction of the translational stimulus is reversed during tilt-translation compared to translation. This is expected  
739 since omnidirectional modulation is not affected by stimulus direction. **(F)** The partial  $R^2$  of the direction-  
740 dependent firing rate modulation was higher than that of omnidirectional modulation in all cells. Data from all  
741 recorded cells ( $n=46$ ) are shown. The color code indicates the cells' classification based on direction-dependent  
742 responses (see **Suppl. Table 2**; green: tilt-selective, red: translation-selective, gray: composite, black: NR). The  
743 broken black lines indicate the threshold of 0.3, below which direction-dependent or omnidirectional responses  
744 are not considered significant.



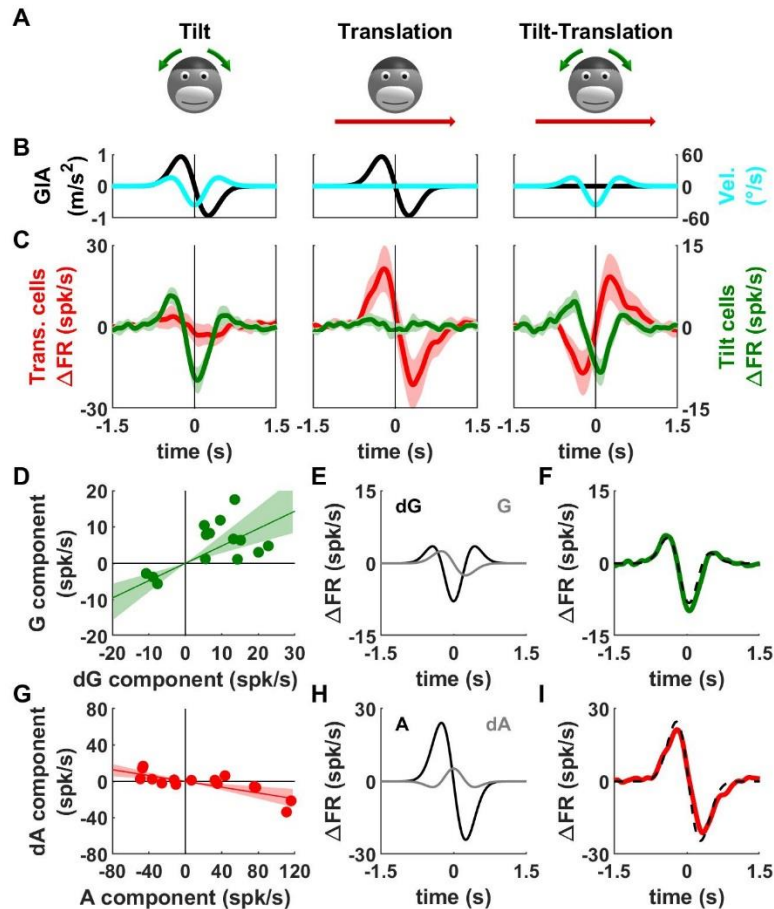

745

746 **Figure 4: Average response profiles of tilt- and translation-selective cells.** (A-B) Illustration of the stimuli (A)  
 747 and sensory inputs (B), as in Fig. 2 (all individual cells are shown in **Fig. 4 Suppl. 1**). (C) Average direction-  
 748 dependent response  $\Delta$ FR (see Methods) of tilt-selective (green, right ordinate axis) and translation-selective  
 749 (red, left ordinate axis) cells. The bands represent 95% CIs. Data shown in response to transient stimuli with  $\sigma =$   
 750 250 ms. Summary of neuronal responses during transient motion of longer duration is shown in **Fig. 4 Suppl. 2**.  
 751 (D) Correlation between the dG and G response components (defined as a “signed” peak to trough response  
 752 amplitude, see Methods, *Composite model*) of tilt-selective cells. (E) Average dG (black) and G (grey) response  
 753 components of tilt-selective cells (see Methods, *Composite model*). (F) Comparison between the sum of the dG  
 754 and G components in (E) and the average response of tilt-selective cells in (C). (G-H) Analysis of the A and dA  
 755 responses of translation-selective cells, as in (D-F).

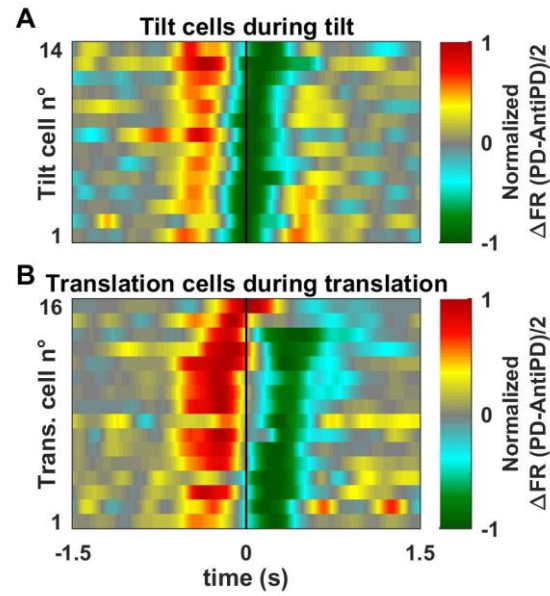

756

757 **Figure 4 Supplement 1: Population response of (A) tilt- and (B) translation-selective Purkinje cells.** We  
758 computed the direction-dependent firing rate modulation ( $\Delta FR$ ) of tilt-selective cells (during tilt) and translation-  
759 selective cells (during translation). The modulation was normalized with respect to its peak absolute value.  
760 Neurons were ordered according to their response timing (timing of the negative peak in tilt-selective cells,  
761 average between the timing of the positive and negative peaks in translation-selective cells). The resulting  
762 population responses are represented using an intensity scale.

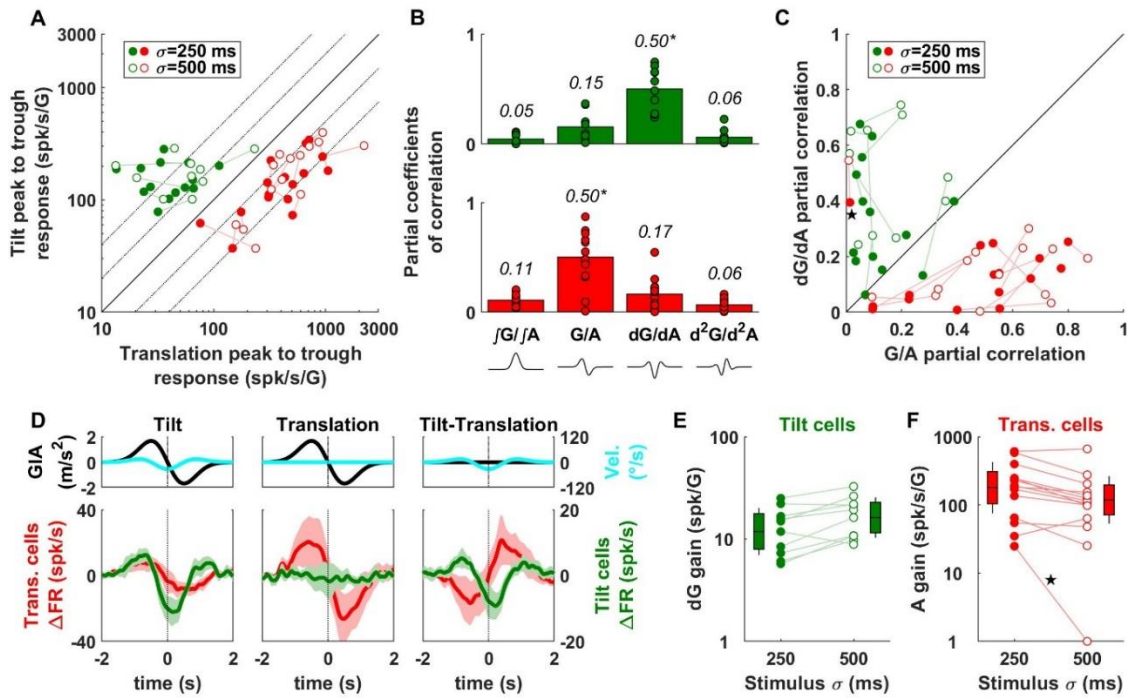

763

764 **Figure 4 Supplement 2: Comparison of neuronal responses during transient motion of longer duration.** We  
 765 recorded the responses of  $n=10$  tilt-selective and  $n=14$  translation-selective cells during transient motion with  
 766  $\sigma=500$ ms. **(A)** Peak-to-trough modulation during tilt versus translation with  $\sigma=250$ ms and  $\sigma=500$ ms (open and  
 767 filled symbols respectively). Data points from individual neurons are joined by lines. **(B)** Partial coefficients of  
 768 correlation of the dynamic components in response to the  $\sigma=500$ ms stimuli. The dG/dA component has a higher  
 769 partial coefficient of correlation compared to all other components ( $p<0.001$ , multiple paired Wilcoxon tests,  
 770 Bonferroni correction) in tilt cells. The G/A component has a higher coefficient in translation cells ( $p<=0.02$ ).  
 771 These results are identical to those observed with the  $\sigma=250$ ms stimuli (Fig. 3B). **(C)** Cell-by-cell comparison of  
 772 the partial correlation of the G/A and dG/dA dynamic components (same symbols as in A). **(D)** Average  
 773 responses  $\Delta$ FR of tilt (green) and translation (red) cells in response to the  $\sigma=500$ ms stimuli. **(E)** dG response gains  
 774 of tilt cells, shown for both  $\sigma=250$ ms and  $\sigma=500$ ms stimuli. Boxes and whiskers indicate the geometrical mean,  
 775 CI and SD (with  $\sigma = 250$  ms: mean = 12 spk/G, CI=[8 - 18]; with  $\sigma = 500$  ms: mean = 16 spk/G, CI=[11 - 23]).  
 776 Although the confidence intervals overlap, there was a small gain increase in all cells resulting in a significant  
 777 increase at the population level (paired Wilcoxon test,  $p = 0.02$ ). **(F)** A (acceleration) gain of translation-selective  
 778 cells. The cell marked by a star exhibits an atypical response pattern and is excluded from the statistical analysis.  
 779 Boxes and whiskers indicate the geometric mean, CI and SD (with  $\sigma = 250$  ms: mean = 180 spk/s/G, CI=[104 -  
 780 308]; with  $\sigma = 500$  ms: mean = 118 spk/s/G, CI=[71 - 195],  $p = 0.03$ , paired Wilcoxon test).

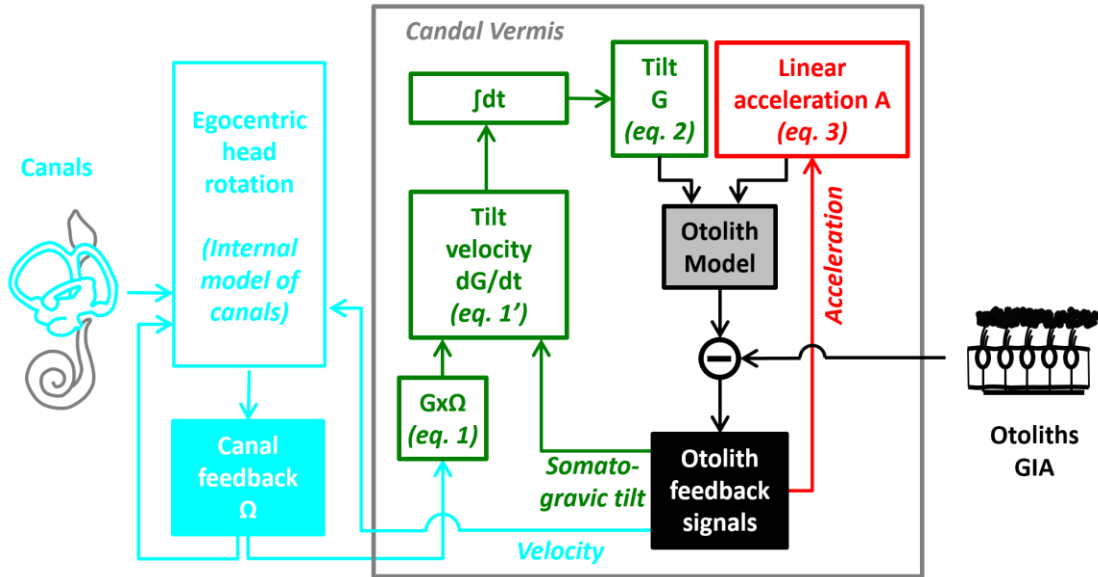

781

782 **Figure 5: Kalman filter model of optimal processing of vestibular signals.** Simplified internal model of  
 783 vestibular information processing (from Laurens and Angelaki 2017). We propose that the caudal  
 784 vermis compute internal estimates of tilt (green pathways) and translation (red pathways) that feed  
 785 into an internal model of the otolith organs (black). During passive translations, the translation  
 786 feedback closes a loop that implements **eq. 3**, whereas the somatogravic feedback contributes a  
 787 corrective component for **eq. 1** (see Methods and Laurens and Angelaki, 2017). Summary of the  
 788 motion variables and equations are shown in **Fig. 5 Suppl. 1**.

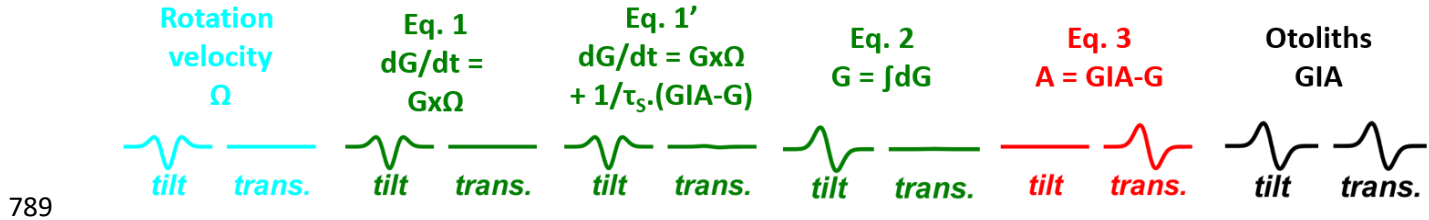

790 **Figure 5 Suppl. 1:** Summary of the motion variables and equations used in **Fig. 5**, and illustration of the

791 temporal profiles of these variables during tilt and translation ( $\sigma=250\text{ms}$ ). Note that the somatogravic

792 feedback (converting **eq. 1** into **eq. 1'**) has not been considered in the analysis of neuronal data

793 recorded here as it plays a minor role in the frequencies used. Specifically, during passive motion, an

794 otolith feedback signal (equal to  $(GIA-G)/\tau_s$ , see Laurens and Angelaki 2011, 2017) is added to **eq. 1**

795 to compute tilt velocity, resulting in eq. 1':  $dG/dt = Gx\Omega + (GIA-G)/\tau_s$ , where  $\tau_s$  is a time constant of  $\sim 0.5\text{s}$ .

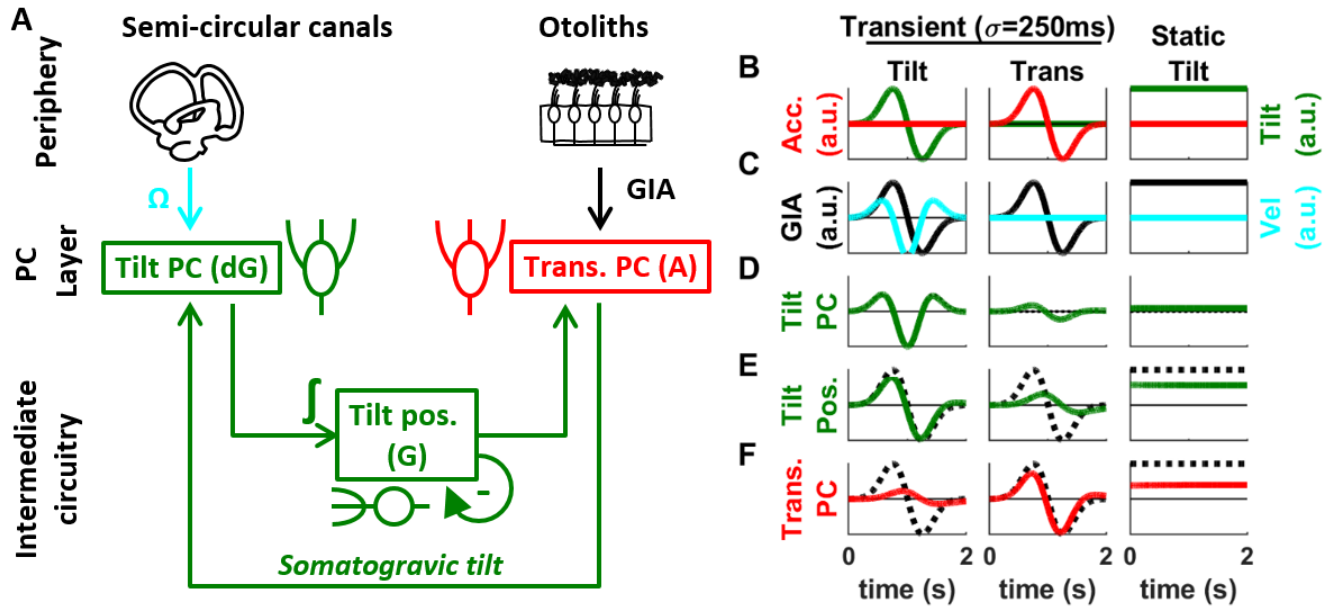

796

797 **Figure 6: Modeling hypothesis  $H_1$  into a simplified neural circuit.** (A) Overview of the proposed neuronal  
 798 circuitry. (B-F) Simulations of the network during tilt and translation. (B) Motion variables (tilt and  
 799 linear acceleration). (C) Sensory variables (GIA and tilt velocity). (D) Simulated response of tilt PCs  
 800 (green). Note that the simulated cells exhibit a faint response during translation (E) Simulated response  
 801 of a neuron encoding tilt position (green). The broken black line represents the GIA. Note (F) Simulated  
 802 responses of a translation-selective PC (red). The broken black line represents the GIA. All variables are  
 803 expressed in arbitrary units.

|                                              |        | Classification based on transients |        |     |       |    | Total |
|----------------------------------------------|--------|------------------------------------|--------|-----|-------|----|-------|
|                                              |        | Tilt                               | Trans. | GIA | Comp. | NR |       |
| Classification based on sinusoids            | Tilt   | 12                                 | 0      | 0   | 1     | 5  | 18    |
|                                              | Trans. | 0                                  | 14     | 0   | 5     | 1  | 20    |
|                                              | GIA    | 2                                  | 1      | 0   | 0     | 2  | 5     |
|                                              | Comp.  | 0                                  | 1      | 0   | 1     | 0  | 2     |
|                                              | NR     | 0                                  | 0      | 0   | 0     | 1  | 1     |
|                                              | Total  | 14                                 | 16     | 0   | 7     | 9  | 46    |
| <i>classification used in the manuscript</i> |        |                                    |        |     |       |    |       |

804

805

806 **Supplementary Table 1: Classification of cells into tilt-, translation-, GIA-selective and composite.**

807 Neurons were classified independently based on sinusoidal motion (0.5Hz,  $\pm 0.2G$ , Angelaki et al. 2004,  
 808 Laurens and Angelaki 2013) and transient motion. The results of both classifications are presented as a  
 809 contingency table. The classification obtained using both data sets was identical for 28/46 (61%) cells.  
 810 Out of the remaining 18 cells, 14 were classified as tilt-, translation- or GIA-selective based on sinusoids  
 811 and composite (n=6) or non-responsive (n=8) cells based on transients. Cells are classified as composite  
 812 when none of the tilt, translation and GIA model is significantly higher than the others and as non-  
 813 responsive when the signal to noise ratio (measured as the VAF of the composite model) is low.  
 814 Therefore, the change in the classification of these cells may be explained by the lower amplitude  
 815 (0.1G) of the transient motion that weakens neuronal responses as well as the statistical power of this  
 816 stimulus. The present study used the more conservative classification based on transients. We verified  
 817 that changing the classification scheme did not alter the main conclusions. Purkinje cells classified as  
 818 GIA-selective or composite (Laurens et al 2013b) have not been further considered here.



|                                                   |        | Classification based on direction-dependent responses |        |     |       |    | Total |
|---------------------------------------------------|--------|-------------------------------------------------------|--------|-----|-------|----|-------|
|                                                   |        | Tilt                                                  | Trans. | GIA | Comp. | NR |       |
| Classification based on omnidirectional responses | Tilt   | 0                                                     | 0      | 0   | 0     | 0  | 0     |
|                                                   | Trans. | 1                                                     | 7      | 0   | 3     | 0  | 11    |
|                                                   | GIA    | 0                                                     | 0      | 0   | 0     | 0  | 0     |
|                                                   | Comp.  | 1                                                     | 0      | 0   | 1     | 0  | 2     |
|                                                   | NR     | 12                                                    | 9      | 0   | 3     | 9  | 33    |
|                                                   | Total  | 14                                                    | 16     | 0   | 7     | 9  | 46    |

*classification used in the manuscript*

819

820 **Supplementary Table 2: Classification of cells based on omnidirectional responses compared to**  
 821 **direction-dependent responses.** The results of both classifications are presented as a contingency  
 822 table. Few (13/46, 28%) cells, mainly translation-selective, exhibit significant omnidirectional  
 823 responses. Most (11/13, 85%) omnidirectional responses occur specifically during translation.
